# Supplementary material for: A global boom in hydropower dam construction
Source: Springer Nature journal article supplement (doi:10.1007/s00027-014-0377-0), 2014-10-24
Supplement: 27_2014_377_MOESM1_ESM.pdf [file 27_2014_377_MOESM1_ESM.pdf]

**AQUATIC SCIENCES (Online Resource)**

**A global boom in hydropower dam construction**

(C. Zarfl, A. E. Lumsdon, J. Berlekamp, L. Tydecks, K. Tockner)

**Supplementary material: Figures S1 – S10**

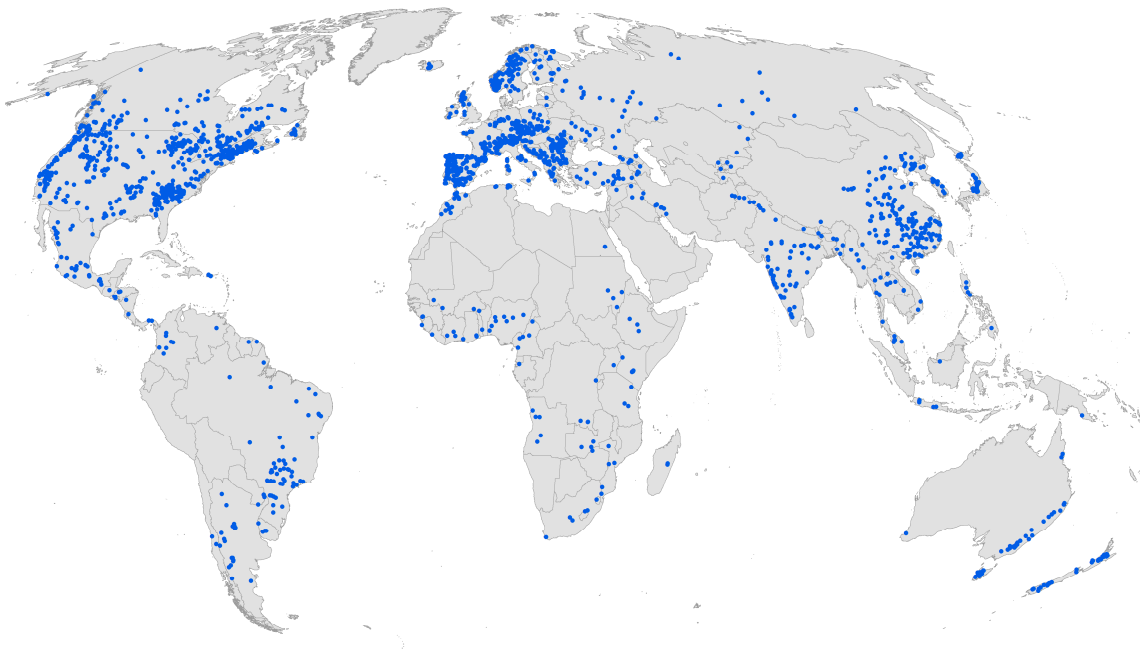

**Fig. S1 Spatial distribution of existing hydropower dams worldwide according to the Grand database (Lehner et al. 2011)**

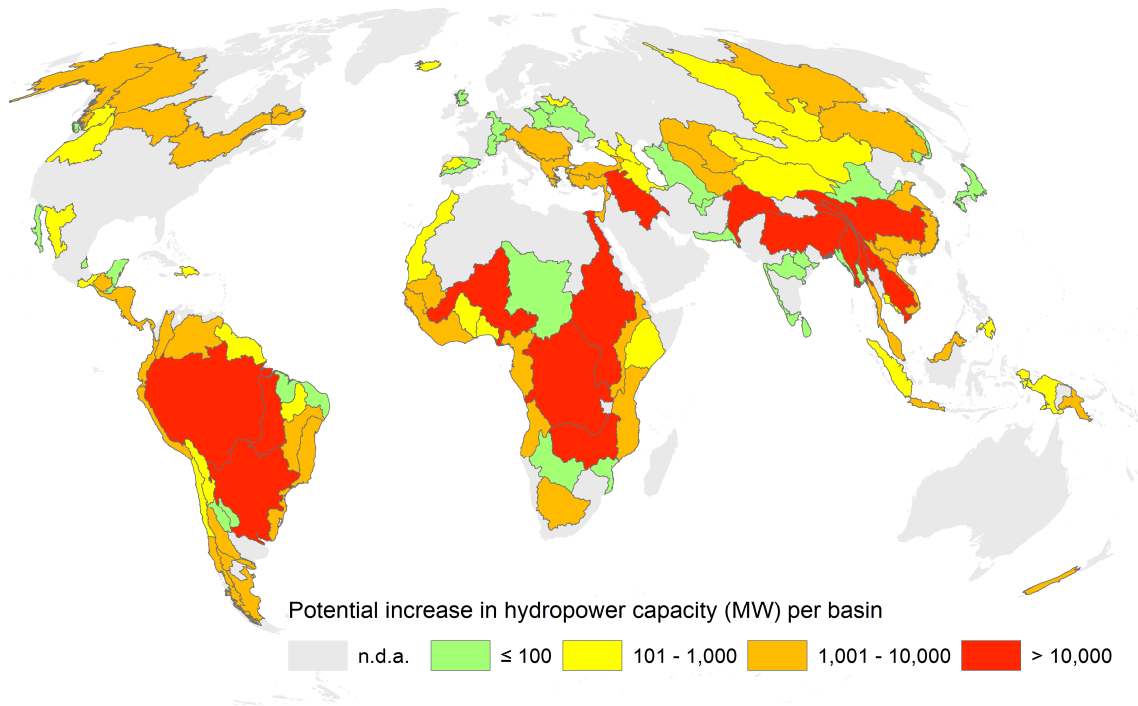

**Fig. S2 Potential increase in hydropower capacity (MW) with construction of future dams.** Red:  $> 10,000$ ; Orange:  $> 1,000 - 10,000$ ; Yellow:  $> 100 - 1,000$ ; Green:  $\leq 100$ ; Gray: no data available

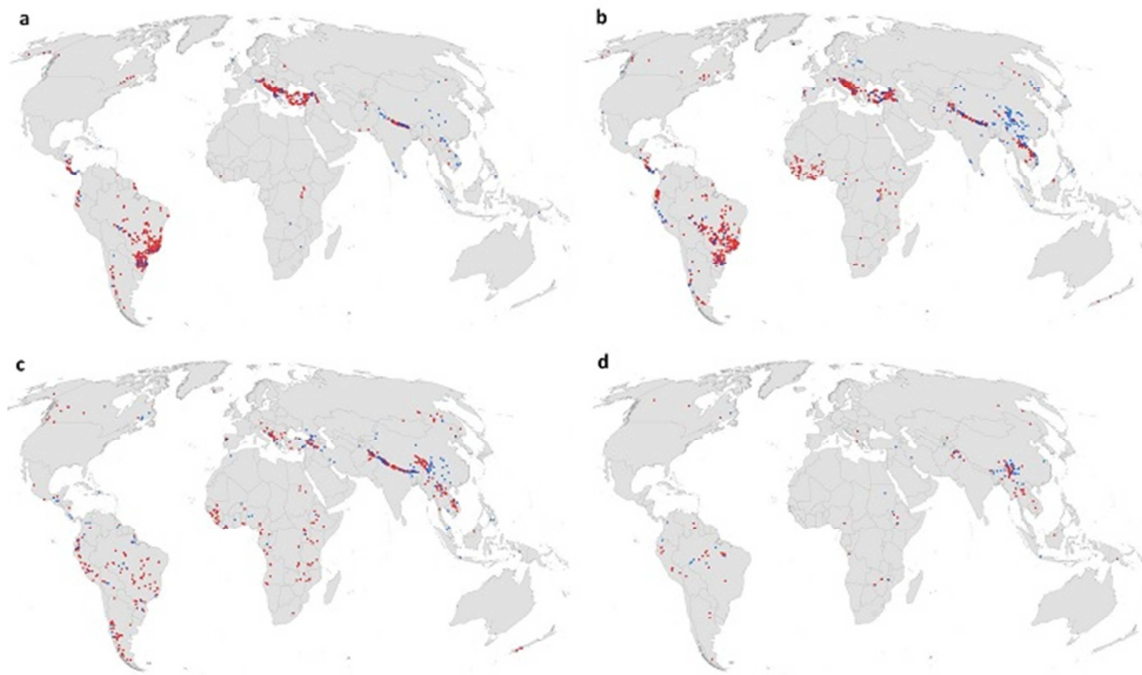

**Fig. S3 Spatial distribution of future hydropower dams classified according to their capacity.** Capacity data are available for 3,490 dams out of the database with 3,700 dams. Percentages given in the following in brackets are related to the total numbers/capacities: **a:** 1 – 10 MW; comprises 1,290 dams (35%) with 6.0 GW (0.8%). **b:** >10 – 100 MW; comprises 1,388 dams (38%) with 51.6 GW (7.3%). **c:** >100 – 1,000 MW; comprises 659 dams (18%) with 221.8 GW (31%). **d:** >1,000 MW; comprises 153 dams (4.1%) with 432 GW (61%)

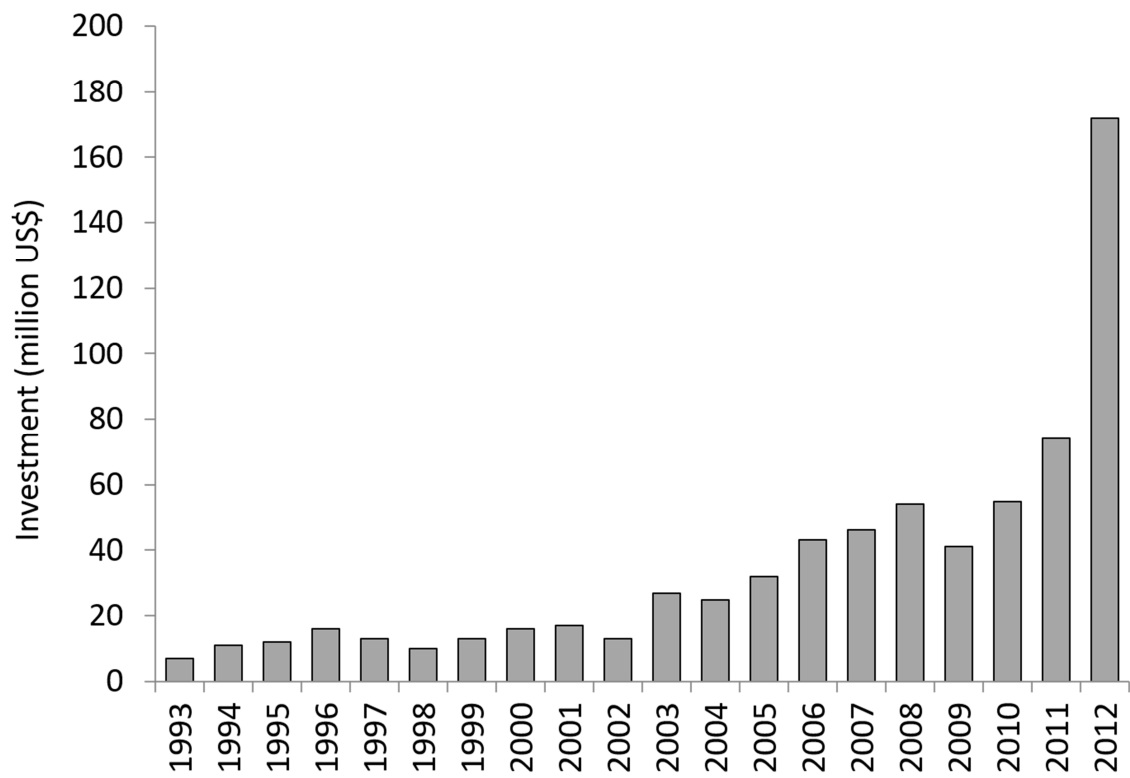

**Fig. S4 Global investments into the hydroelectricity sector.** Data represented do not comprise a complete overview due to constraints in availability (see *Methods and Materials* for further details)

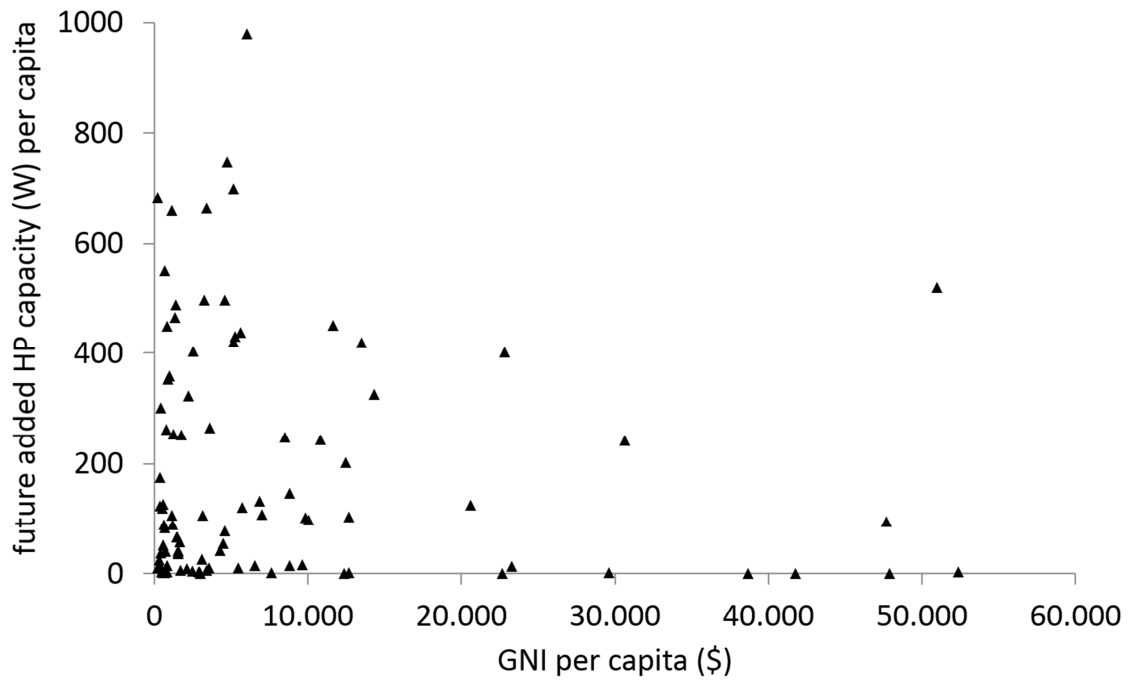

**Fig. S5 (In-)Dependence of future added hydropower capacity (W) per capita in 102 countries on their respective GNI per capita (2012; The World Bank 2014e)**

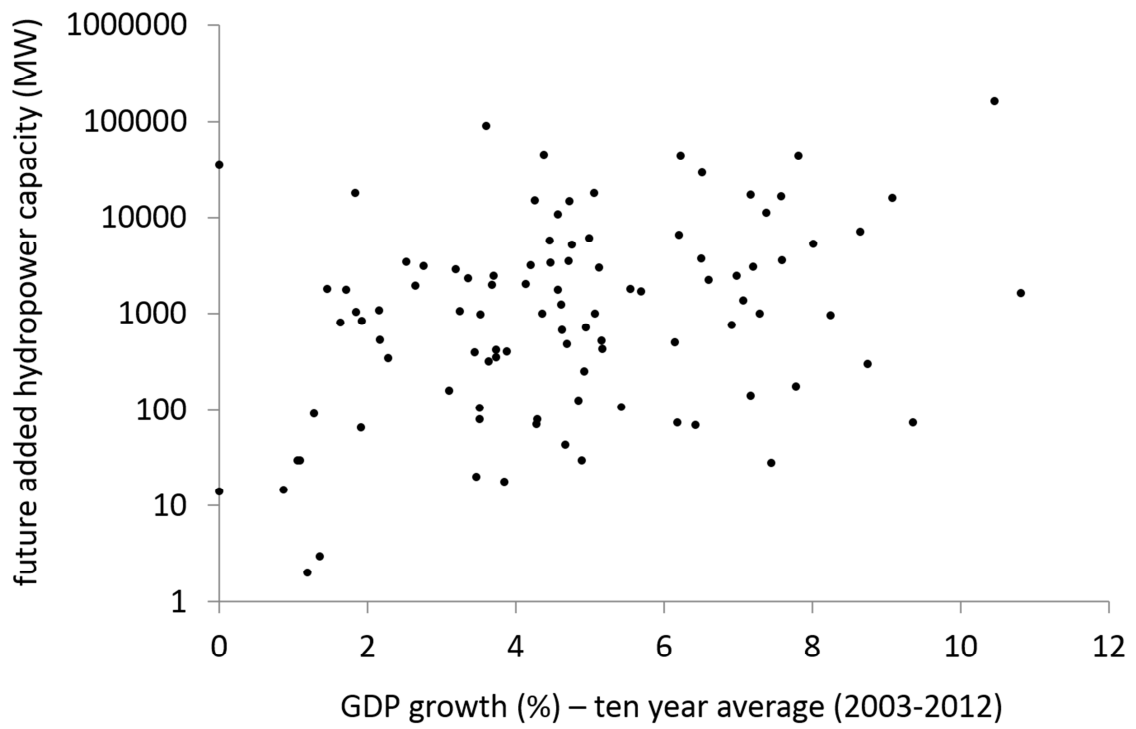

**Fig. S6 Added hydropower capacity by future dams per country in dependence on the economic growth of the country (averaged GDP growth (%) 2003-2012)**

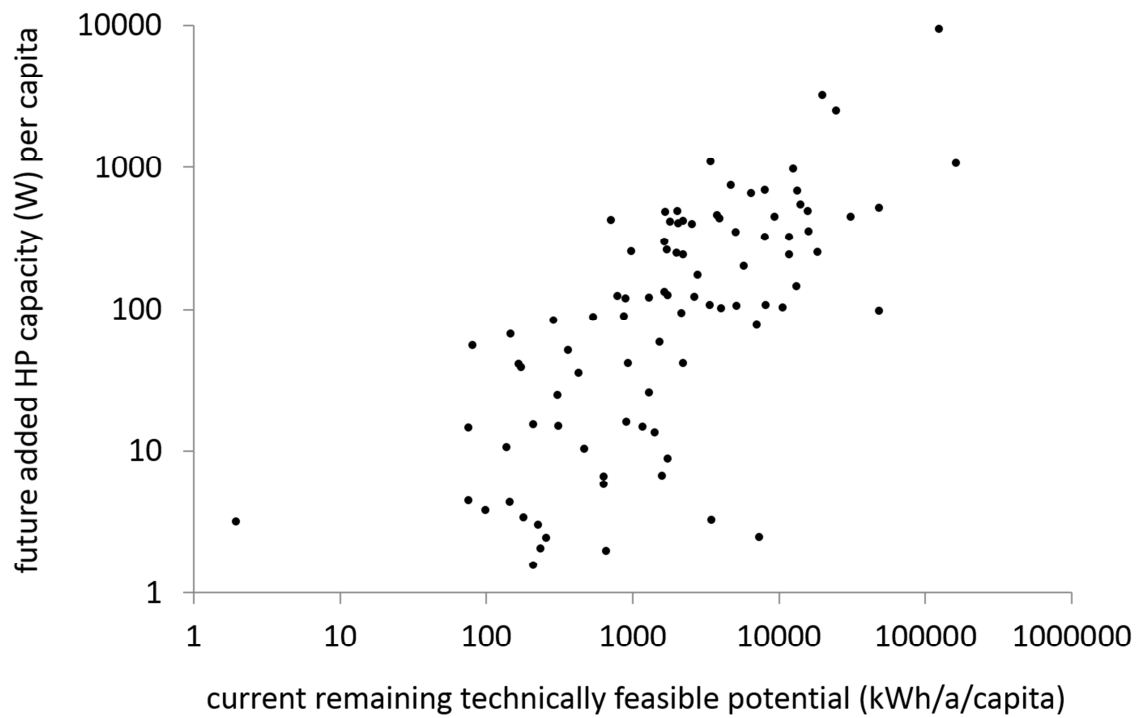

**Fig. S7 Dependence of future added hydropower capacity (W) per capita on the currently exploited technically feasible hydropower potential (kWh year<sup>-1</sup> per capita).** Details on the exploitation of the technically feasible hydropower potential per country can be shown in Fig. S8

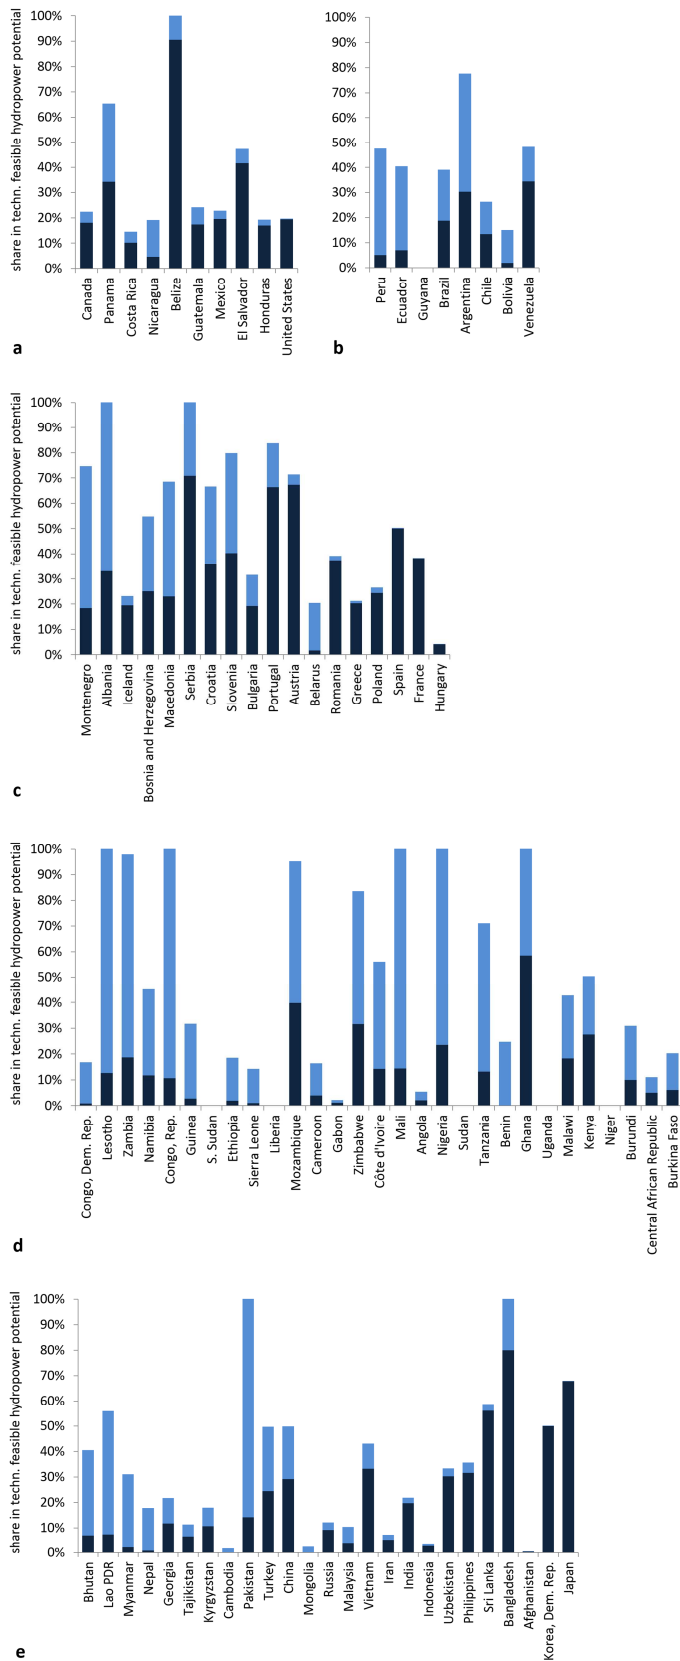

**Fig. S8 Current (2011, dark blue) and future (light blue) exploitation of the technically feasible hydropower potential in countries of a: North and Central America; b: South America; c: Europe; d: Africa; e: Asia. Countries are sorted according to decreasing total technically feasible hydropower potential (MW). The representation of the sum of current and future share exceeds in some cases 100% which is due to the required conversion for future dams from MW to GWh year<sup>-1</sup> assuming current efficiencies as described in the *Methods and Materials* section. Another reason might also be that not all of the planned (but here considered) dams will eventually be constructed**



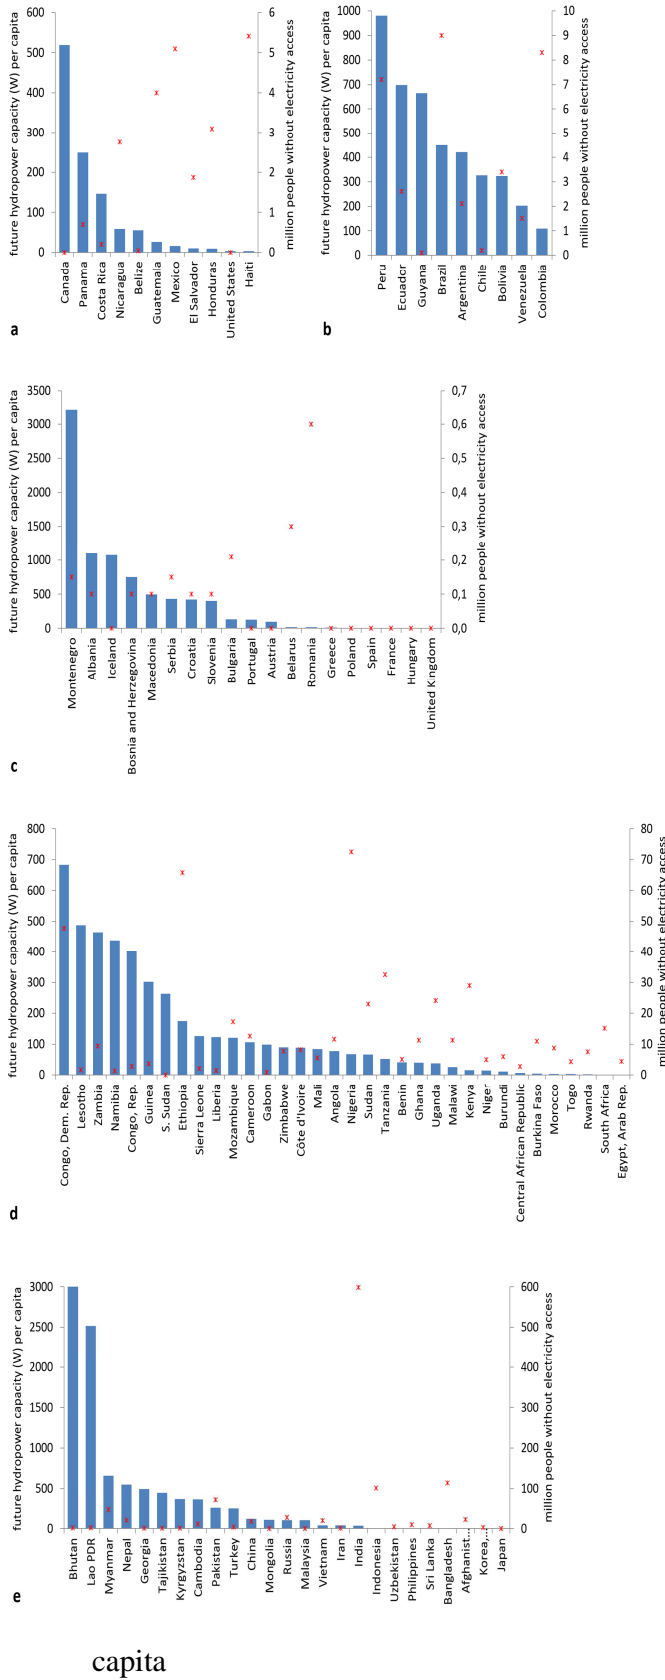

**Fig. S9 Future added hydropower capacity (W; blue columns) per capita and number of people (million) without access to electricity (2000; red crosses) in countries of a: North and Central America; b: South America; c: Europe; d: Africa; e: Asia. The representation of the future capacity in Bhutan exceeds the scale of the y-axis and amounts to 9,544 W per capita**



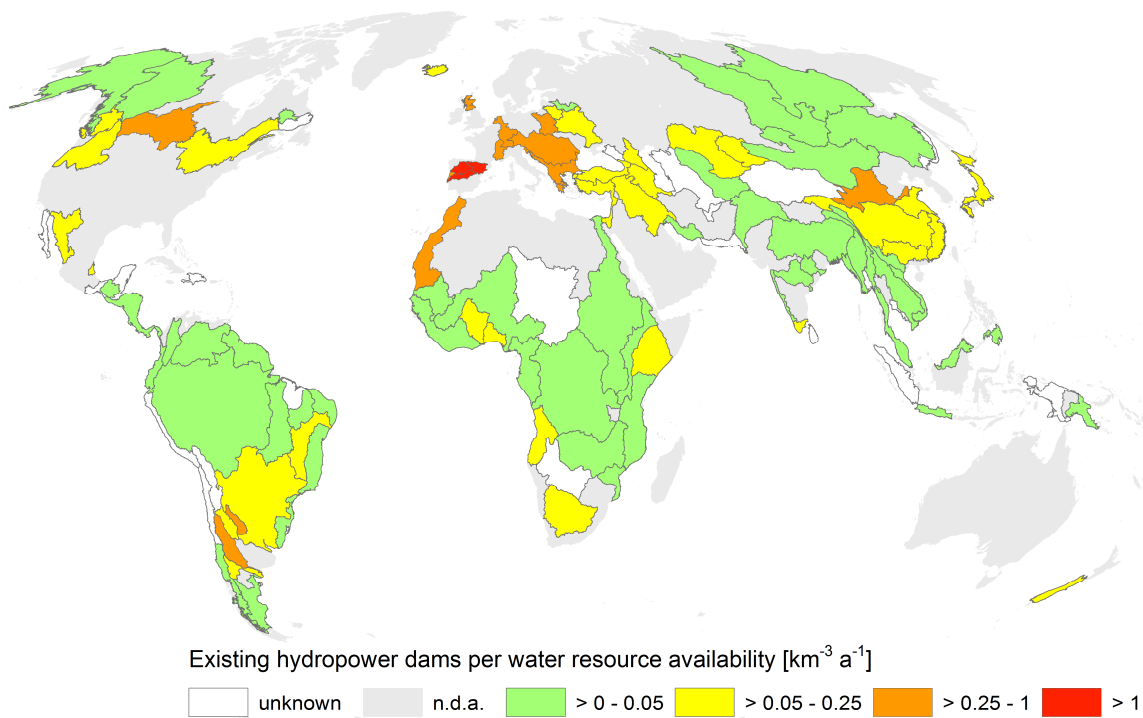

**Fig. S10** Number of existing hydropower dams (Lehner et al. 2011) in relation to major river basin discharge (dams per  $\text{km}^3 \text{year}^{-1}$ ). *Red:* > 1; *Orange:* > 0.25 – 1; *Yellow:* > 0.05 – 0.25; *Green:* > 0 – 0.05; *Gray:* no data available; *White:* unknown
