# Supplementary material for: A global boom in hydropower dam construction
Source: Springer Nature journal article supplement (doi:10.1007/s00027-014-0377-0), 2014-10-24
Supplement: MOESM2 [file 27_2014_377_MOESM2_ESM.xls]

## Sheet: Info
AQUATIC SCIENCES (Online Resource)
A global boom in hydropower dam construction
(C. Zarfl, A. E. Lumsdon, J. Berlekamp, L. Tydecks, K. Tockner)
Supplementary material: Data spreadsheets Table S1 - Table S8

## Sheet: Table S1 North&Central America
Table S1. List of 359 references for compiled future hydropower dam data.
North & Central America
1	Amezcua, I., et al., “Tenosique: Análisis económico-ambiental de un proyecto hidroeléctrico en el río Usumacinta” (Conservacion Estratégica, Curridabat, Costa Rica, 2007); http://conservation-strategy.org/sites/default/files/field-file/10_Reid_Usumacinta.pdf.
2	BC Hydro, “BC hydro 2008 long term acquisition plan, appendix f8: Potential large hydro project report” (BC Hydro, Vancouver, Canada, 2008); http://www.bchydro.com/content/dam/hydro/medialib/internet/documents/info/pdf/2008_ltap_appendix_f8.pdf.
3	Brookfield Renewable Energy Partners, Construction activity update, (2012); http://www.kokishriver.com/content/information_updates/construction_activity_update-34185.html.
4	Brookfield Renewable Energy Partners, Recent news, (2011); http://www.pehonanhydroelectric.com/content/information_centre/recent_news-3271.html.
5	Canadian Projects Limited, “Dunvegan hydro project project definition” (Calgary, Alberta, Canada, 2006); http://www.ceaa.gc.ca/050/documents_staticpost/cearref_2996/166-06.pdf.
6	G. Daniel, “Principle hydropower under construction”(2010); http://mensual.prensa.com/mensual/contenido/2010/05/24/hoy/panorama/1380810.pdf.
7	D. Davis, “Hydroelectric power development in Belize” (Belize Energy Limited, Belize City, Belize, 2002); http://www.carilec.org/Presentations/RE_Conf_2002/Hydroelectricity%20Development%20in%20Belize.pdf.
8	Développement Du Nord : Projets et infrastructures, (2012); https://maps.google.ca/maps/ms?msa=0&msid=201101750506570570762.0004c84497fb28f311de2.
9	Devex, Feasibility studies for potential hydropower, (n.d.); https://www.devex.com/en/s/artibonite-4c---in-haiti-feasibility-studies-for-a-potential-hydropower-.
10	Dora Carías Vega, A. C. Q., et al., “Estudio de impacto ambiental proyecto hidroeléctrico Reventazón ” (European Investment Bank, Luxembourg, n.d.); http://www.eib.org/attachments/pipeline/20120472_nts_es.pdf.
11	El Instituto Costarricense De Electricidad, Plantas y proyectos - ice y priv, (San José, Costa Rica, 2014); https://www.grupoice.com/wps/portal/.
12	Energy Manitoba, Hydro projects - Conawapa, (2009); http://www.energymanitoba.org/hp_conawapa.htm.
13	Gomez-Balandra, M. A. et al., Indicators to follow up hydro impacts and mitigation, paper presented at the 32nd annual meeting of the International Association for Impact Assessment, Porto, 01 June, 2012; http://www.iaia.org/conferences/iaia12/uploadpapers/Final%20papers%20review%20process/Gomez-Balandra,%20Maria.%20%20Indicators%20to%20follow-up%20hydro%20impacts%20and%20mitigation.pdf?AspxAutoD…
14	Gómez, E., Hydropower & economic benefits for populations, presented at the 31st Annual Meeting of the IAIA, Puebla, Mexico, 4 June, 2011; http://www.iaia.org/conferences/iaia11/proceedings/presentations/hydro%20and%20social%20comp.pdf?AspxAutoDetectCookieSupport=1.
15	Hydro Québec, Developing Quebec’s hydropower potential, (n.d.); http://www.hydroforthefuture.com/projets/9/developing-quebec-s-hydropower-potential.
16	Hydro Québec, “Programme d'achat d'électricité de 150 mw provenant de centrales hydroélectriques de 50 mw et moins soumissionnaires retenus — 30 juin 2010”, (Hydro Québec, Montréal, Canada, 2010); http://www.hydroquebec.com/4d_includes/depdoc/cpe/fr/Carte_Soumissions_retenues.pdf.
17	Hydro Québec, “Strategic plan 2009–2013” (Hydro Québec, Montréal, Canada, 2009); http://www.hydroquebec.com/publications/en/strategic_plan/pdf/plan-strategique-2009-2013.pdf.
18	Hydro Review, El Salvador opens tendering for re-designed el-Chapparal, (2013); http://www.hydroworld.com/articles/2013/08/el-salvador-opens-tendering-for-redesigned-65-8-mw-el-chaparral-hydro-project.html.
19	Hydropower Reform Coalition, Allison creek : P-13124, (2012); http://www.hydroreform.org/projects/allison-creek-p-13124.
20	Hydropower Reform Coalition, Dillingham : P-14356, (2012); http://www.hydroreform.org/projects/dillingham-p-14356.
21	Hydropower Reform Coalition, Scenery lake: P-13365, (2012); http://www.hydroreform.org/projects/scenery-lake-p-13365.
22	Hydropower Reform Coalition, Ruth lake : P-13366, (2012); http://www.hydroreform.org/projects/ruth-lake-p-13366.
23	Hydropower Reform Coalition, Schubee lake p-13645, (2012); http://www.hydroreform.org/projects/schubee-lake-p-13645.
24	Hydropower Reform Coalition, Susitna-watana : P-14241, (2012); http://www.hydroreform.org/projects/susitna-watana-p-14241.
25	Inter-American Investment, C., PN3755A-01: San Lorenzo; http://www.iic.org/en/projects/panama/pn3755a-01/san-lorenzo.
26	Keeyask Hydropower Limited Partnership, About the projects, (2012); http://keeyask.com/wp/the-project.
27	Kenai Hydro, About the project: Project area, (2012); http://www.kenaihydro.com/about_the_project/project_area.php.
28	Kyoto Protocol's Clean Development Mechanism (CDM), Project cycle database, (2013); http://cdm.unfccc.int/Projects/projsearch.html.
29	Lee, P., Hanneman, M., Cheng, R., “Hydropower developments in Canada: Number, size and jurisdictional and ecological distribution” (Global Forest Watch Canada, Edmonton, Alberta, 2011); http://www.globalforestwatch.ca/pubs/2012Energy/02Hydro/Hydro2_GHGs_Energy_Environment.pdf.
30	Ministerio De Energia Y Minas Republica De Nicaragua, “Ubicación de proyectos de centrales hidroeléctricas” (Nicaragua Ministry of Energy and Mines, Managua, Nicaragua, 2013); http://www.mem.gob.ni/index.php?s=1.
31	Ministry for Public Works Transportation and Communications, Bureau of Mines and Energy and Electricity of Haiti, “Haiti energy sector development plan 2007 - 2017” (Bureau of Mines and Energy and Electricity of Haiti, Port-au-Prince, Haiti, 2006); http://www.bme.gouv.ht/energie/National_Energy_Plan_Haiti_Revised20_12_2006VM.pdf.
32	Nalcor Energy, Lower Churchill project, (n.d.); http://www.nalcorenergy.com/lower-churchill-project.asp.
33	Ontario Power Generation Inc, Lower site - proposed site layout, (n.d.); http://www.littlejackfish.com/pdf/LJF_lower_map.pdf.
34	Hydro Québec, “Complexe de la romaine” (Hydro Québec, Montréal, Canada, 2007); http://www.hydroquebec.com/romaine/pdf/ei_volume01.pdf.
35	Hydro Québec., “Sustainable development action plan” (Hydro Québec, Montréal, Canada, 2013); http://www.hydroquebec.com/publications/en/sd_action_plan/pdf/plan_action_dd.pdf.
36	Secretaría De Energía, Estadísticas e indicadores del sector eléctrico, (n.d.); http://beta.energia.gob.mx/portal/Default.aspx?id=1430.
37	Secretaría Nacional De Energía, “Coordenadas de las hidroeléctricas” (Secretaría Nacional de Energía , Panama, Republic of Panama, 2014).
38	Senes Consultants Limited, “Little jackfish river hydroelectric development project description” (Senes Consultants Limited ,Ontario, Canada, 2011); http://www.littlejackfish.com/pdf/LJF_Project_description30Aug2011.pdf.
39	Veo Verde, Mexico: The dam Las Cruces and industrial invasion in the Huichol sacred places, (n.d.); http://www.veoverde.com/2012/05/mexico-la-represa-tres-cruces-y-la-invasion-industrial-en-el-sagrado-pueblo-huichol/&prev=/search%3Fq%3DCruces% 2Bpresa%2Bmexico%26client%3Dfirefox-a%26rls%3Dorg.mozilla:de: official%26channel%3Dfflb%26biw%3D1760%26bih%3D980.
40	World Energy Council, “2010 survey of energy resources” (World Energy Council, London, United Kingdom, 2010); http://www.worldenergy.org/documents/ser_2010_report_1.pdf.

## Sheet: Table S1 - South America
Table S1. List of 359 references for compiled future hydropower dam data.
South America
1	Agência Nacional De Energia Elétrica, Hidroeléctrica planificada, (2013); http://sigel.aneel.gov.br/sigel.html.
2	Asociacion Integral De Politicas Publicas A. C., “La crisis electrica en venezuela” (Asociacion Integral De Politicas Publicas, Caracas, Venezuela, n.d); http://www.soberania.org/Archivos/Crisis_electrica_y_agua_en_Venezuela.pdf.
3	M. C. L. D'alessandro, “Hydroelectric energy assessment of Tayucay” (Edelca, Caracas, Venezuela, 2004); http://translate.google.co.uk/translate?hl=en&sl=es&u=http://sg.cier.org.uy/Publicaciones/Revista.nsf/0a293b20eacdf8a903257133003ea67d/c3abbb7b318e0d2d03257146004ab71d%3FOpenDocument&prev=/search%3Fq%3Dtayucay%26safe%3Doff%26biw%3D1163%26bih%3D567.
4	Endesa, Chile, (2011); http://www.endesa.com/en/aboutEndesa/businessLines/principalesproyectos/Chile.
5	Forero, J., Brazil's hydroelectric dam boom is bringing tensions as well as energy, (2013); http://www.theguardian.com/world/2013/feb/12/brazil-hydroelectric-jirau-dam#start-of-comments.
6	Greenpeace Chile, Sobre aprobación de proyecto río Cuervo, (2012); http://www.greenpeace.org/chile/es/prensa/comunicados-de-prensa/Aprobacion-de-Proyecto-Rio-Cuervo-evidencia-la-vulnerabilidad-de-la-institucionalidad-ambiental-chilena/.
7	Guyana Energy Agency, Hydro sites under consideration, (2006); http://www.gea.gov.gy/energy-development/hydropower.
8	Hydro Review, Brazil's 362-mw Maua hydropower project gets permit after 11-year delay, (2012); http://www.hydroworld.com/articles/2012/10/brazils-362-mw-maua-hydropower-project-gets-permit-after-11-year-delay.html.
9	Impreglio Group, Angostura hydroelectric plant, (2012); http://www.impregilo.it/en/investor/strategy/major-projects/angostura-hydroelectric-plant.
10	IMPSA Hydro, “Cóndor cliff y la Barrancosa” (n.d.); http://www.impsa.com/es/descargas/hydro%20segunda%20toma/E%29%20CONDOR%20CLIFF%20Y%20LA%20BARRANCOSA.pdf.
11	IMPSA Hydro, Hydropower plant Tocoma, (IMPSA Caribe, Caracas, Venuezuela, n.d.); http://www.impsa.com/en/downloads/HYDRO/TOCOMA.pdf.
12	Indagan Atentado Incendiario a Central Hidroeléctrica Rucatayo, (2012); http://www.lanacion.cl/noticias/site/artic/20120430/pags/20120430111317.html.
13	International Bank for Reconstruction and Development, “Notice of registration” (The World Bank, Washington, USA, 2010); http://www-wds.worldbank.org/external/default/WDSContentServer/WDSP/IB/2010/06/25/000334955_20100625011221/Rendered/PDF/552690IPNR0P09101Official0Use0Only1.pdf.
14	International Rivers, Berkeley, CA, USA ; http://www.internationalrivers.org.
15	International Rivers, Fundación Proteger, Ecoa., Dams in Amazonia, (n.d.); http://www.dams-info.org.
16	Isagen, Sogamoso hydroelectric project, (n.d.); http://www.isagen.com.co/metaInst_Eng.jsp?rsc=infoIn_Eng_proyectoSogamoso&tituloPag=ISAGEN,%20Sogamoso%20Hydroelectric%20Project.
17	Kenyon, P., Alto maipo hydro project - tunneltalk, (2012); http://www.tunneltalk.com/Chile-Nov12-Four-TBMs-for-Alto-Maipo-hydro-project.php.
18	Kubeck, B., The Amaila hydropower project, (n.d.); http://www.sitheglobal.com/projects/amaila.cfm.
19	Kyoto Protocol's Clean Development Mechanism (CDM), Project cycle database, (2013); http://cdm.unfccc.int/Projects/projsearch.html.
20	Martin, D. E., Estudio de impacto ambiental proyecto hidroeléctrico alto maipo, (n.d.); http://seia.sea.gob.cl/documentos/documento.php?idDocumento=2933048.
21	Ministerio De Economía Y Finanzas Públicas, Hidroeléctrica planificada, (Ministerio De Economía Y Finanzas, Buenos Aires, Argentina, 2010).
22	Ministerio De Minas Y Energía, Hidroeléctrica planificada, (Ministerio De Minas Y Energía, Bogota, Columbia, 2010)
23	Ministerio De Hidrocarburos Y Energía, Hidroeléctrica planificada, (Ministerio De Hidrocarburos Y Energía, La Paz, Bolivia, 2010)
24	Motta, C. , Luiz, S., Borges, J. B., Ortega, M. C., Moraes, R. B. D., “Simplício hydroelectric project on the Paraíba do Sul river” (Comite Brasileiro De Barragens, Rio de Janiro, Brazil n.d.); http://www.cbdb.org.br/documentos/mbdiii/Simplicio.pdf.
25	Pacific Hydro Chile S.A., “Estudio impacto ambiental proyecto hidroeléctrico nido de águila” (Pacific Hydro Chile, Santiago, Chile, n.d.); https://www.e-seia.cl/archivos/EIA_Nido_-_Cap_1-_Descripcion.pdf.
26	Pro-Ambiente J & M.S.A, “Environmental impact assessment Camu river multipurpose project” (Pro-Ambiente J & M.S.A , Santo Domingo, Dominican Republic, 2002); http://www.banktrack.org/manage/ems_files/download/environmental_impact_assessment_camu_river_multipurpose_project_1/200207_environmental_impact_study_guiagui_dam_0.pdf.
27	Proyecto Manabao-Bejucal- Tavera, (n.d.); http://www.arqhys.com/construccion/proyecto-tavera.html.
28	Stjacques Online: A Freedom Blog, Venezuelan electrical power crisis, part ii: The costs of deprofessionalization and corruption under Chavez, (2010); http://stjacquesonline.blogspot.de/2010/02/venezuelan-electrical-power-crisis-part.html.
29	World Energy Council, “2010 survey of energy resources ” (World Energy Council, London, United Kingdom, 2010); http://www.worldenergy.org/documents/ser_2010_report_1.pdf.

## Sheet: Table S1 - Europe
Table S1. List of 359 references for compiled future hydropower dam data.
Europe
1	Arcadis & Atecma, “Technical assessment of the Portuguese national program for dams with high hydropower potential (PNBEPH) phase i and ii” (Arcadis, Ghent, Belgium & Atecma, Madrid, Spain, 2009); https://bibliotecadigital.ipb.pt/handle/10198/2916.
2	A. Bartle, R. Taylor, Hydropower and Dams World Atlas and Industry guide. Aqua-Media International, (2012).
3	Belarus to launch cascade of 4 hydro power stations on Western Dvina in 2016, (2012); http://export.by/en/?act=news&mode=view&id=45866.
4	Belenergo State Production Association, “Сonstruction of Mogilevskaya hydropower station on the Dnieper in Mogilev region ” (Belenergo State Production Association, Mogilev, Belarus, 2011); http://mogilev.energo.by/en-us/investmentprojects.aspx.
5	Belenergo State Production Association, “Сonstruction of Shklovskaya hydropower station on the Dnieper in Mogilev region ” (Belenergo State Production Association, Mogilev, Belarus, 2011); http://mogilev.energo.by/en-us/investmentprojects.aspx.
6	Bezirks Blätter, Schlagabtausch zum evn-kraftwerk hohe brücke, (n.d.); http://www.meinbezirk.at/amstetten/politik/schlagabtausch-zum-evn-kraftwerk-hohe-bruecke-d529290.html.
7	Das Rechtsinformationssystem des Bundes, Kraftwerksprojekte an der unteren Ybbs, (2013); https://www.ris.bka.gv.at/Dokument.wxe?Abfrage=Umse&Dokumentnummer=UMSET_19951031_US_05_1995_1_00.
8	Devoll Hydropower Sh.A., Banjë HPP, (n.d.); http://www.devollhydropower.al/new/index.php/en/our-project-2/project-overview/banje-hpp.
9	Doka Gmbh, Castrovido dam, (n.d.); http://www.doka.com/web/references/index.en.php?refid=8213.
10	EDP Energias De Portugal, Taste of the lower dam, (2012); http://translate.google.de/translate?hl=en&sl=pt&u=http://www.a-nossa-energia.edp.pt/centros_produtores/empreendimento.php%3Fitem_id%3D1&prev=/search%3Fq%3DBaixo%2BSabor%26hl%3Den%26biw%3D1920%26bih%3D1069&sa=X&ei=3oldUenMGsjHsgaQ2oCIBQ&ved=0CEsQ7gEwBA.
11	E. Egidarev, Dams in Amur river basin database, (2012); http://amur-heilong.net/vicarr/object.php?action=show&id=201.
12	Energii Ashta, Project description, (n.d.); http://www.energji-ashta.al/eashta/project-description/.
13	FCC Construccion, Hydroelectric project in Portugal, (n.d.); http://comunicacion-fccco.fcc.es/static/WFccco/boletines/eng/2010/Boletin_enero_2010_eng/adjudicaciones_01.htm.
14	Finnish Belarusian Chamber of Commerce, “FBCC newsletter headlines on May 2011” (Finnish Belarusian Chamber of Commerce, Helsinki, Finland, 2011); http://finnpartnership.fi/__kehitysmaatieto__/157/Microsoft%20Word%20-%20FBCC.Newsletter.May.2011.pdf.
15	Amiantit, “Flowtite case studies” (Mochau, Germany, n.d.); http://www.aps-sales.no/media/Pdf/hydropower_europe_case_studies.pdf.
16	Goby, B., Wasserkraftwerksliste des Umweltdachverbandes: Wasserkraftwerke in Planung - Stand 31. März 2013, (2013); http://www.umweltdachverband.at/themen/wasser/wasserkraft/uwd-wasserkraftwerksliste/#c527.
17	Holding Slovenske Elektrarne D.O.O., Construction of HPPS on the lower Sava river, (n.d.); http://www.hse.si/en/projects/hydro/construction-of-hpps-on-the-lower-sava-river.
18	International Commission for the Protection of the Danube River, “List of the future infrastructure projects in the DRBD” (International Commission for the Protection of the Danube River , Vienna, Austria, n.d.); http://www.rowater.ro/TEST/Planul%20de%20Management%20al%20Districtului%20International%20al%20Dunarii/Anexe/DRBMP_Annex_07_List_Future_Infrastructure_Projects.pdf.
19	Kanu Magazine, Paddler auf die Barrikaden: Protest am Talbach, (2010); http://www.kanumagazin.de/szene/news/paddler-auf-die-barrikaden-protest-am-talbach/calp/1512082800/.
20	Kryžanowski, A., Horvat, A., Brilly, M., “Hydro power plants on the middle Sava river section” (University of Ljubljana, Faculty of civil and geodetic engineering, Ljubljana, 2008); http://ksh.fgg.uni-lj.si/bled2008/cd_2008/04_Water%20management/ 159_Kryzanowski.pdf.
21	Kyoto Protocol's Clean Development Mechanism (CDM), Project cycle database, (2013); http://cdm.unfccc.int/Projects/projsearch.html.
22	Landsvirkjun, Búðarháls, (n.d.); http://www.thjorsa.is/category.aspx?catID=59.
23	Landsvirkjun, Holt, (n.d.); http://www.thjorsa.is/category.aspx?catID=48.
24	Landsvirkjun, Hvammur, (n.d.); http://www.thjorsa.is/category.aspx?catID=48.
25	Landsvirkjun, Urriðafoss, (n.d.); http://www.thjorsa.is/category.aspx?catID=48.
26	Large Dam Database in Greece, (n.d.); http://itia.ntua.gr/~nikos/dams/list%20of%20dams/r_Acheloos/acheloos%20dams.htm.
27	Lebensraum Kainach, Die wasserkraftprojekte, (n.d.); http://www.lebensraum-kainach.at/wasserkraft.html?sn=Wasserkraft.
28	Ministry of Energy of the Republic of Belarus, “Сonstruction of Nemnovskaya hydropower station on the Neman river in Grodno region (20 MW) in the republic of Belarus on build-operate-transfer basis (bot)” (Ministry of Energy of the Republic of Belarus , Minsk, Belarus, n.d.); http://austria.new.mfa.gov.by/uploademb/austria/nemnovskaya_hydropower_station_9.pdf.
29	Nachrichten, Ennskraftwerke wollen Kraftwerk bei Rederbrücke Heuer einreichen, (2012); http://www.nachrichten.at/oberoesterreich/steyr/Ennskraftwerke-wollen-Kraftwerk-bei-Rederbruecke-heuer-einreichen;art68,801386.
30	G. Riedmann, Grünes licht für wasserkraft, (2011); http://www.vol.at/gruenes-licht-fuer-wasserkraft/news-20110212-09195587.
31	M. Ruggenthaler, Kraftwerk für Defereggen, (2011); http://www.kleinezeitung.at/tirol/lienz/2705491/kraftwerk-fuer-defereggen.story.
32	RWEInnology, Site statistics, https://www.rwe.com/web/cms/en/403250/rwe-innogy/sites/hydroelectric-power-station/united-kingdom/sites-under-construction/site-statistics/.
33	Salzburg AG für Energie, Verkehr und Telekommunikation, Wasserkraftwerk Kendlbruck / Lungauer Mur, (n.d.); http://www.salzburg-ag.at/herkunft/neue-projekte/kraftwerk-kendlbruck-lungau/#kraftwerk-kendlbruck-lungau-projekt-1.
34	Schöberl, A., Nicht zwei, sondern ein größeres kraftwerk, (2011); http://www.kleinezeitung.at/steiermark/leoben/2901470/nicht-zwei-sondern-ein-groesseres-kraftwerk.story.
35	Schwarz, U., “Balkan rivers - the blue heart of Europe: hydromorphological status and dam projects” (n.d.); http://riverwatch.eu/wp-content/uploads/2012/05/BalkanRiverAssessment29032012web.pdf.
36	Schwinghammer, U., Debantbach löst prozesslawine aus, (2013); http://www.kleinezeitung.at/tirol/lienz/3228470/debantbach-loest-prozesslawine.story.
37	Senderswind, Grünes licht für kraftwerk Sellrain, (2012); http://www.senderswind.at/gruenes-licht-fuer-kraftwerk-sellrain.
38	Somague, Foz Tua dam - laying of the first stone, (2011); http://www.somague.pt/site/shownews.asp?idn=786&lg=en.
39	Stadtwerke Feldkirch, Aktuelles zum kraftwerksbau am Illspitz, (2013); http://www.feldkirch.at/stadtwerke/energie/stromerzeugung/kraftwerk-illspitz-projekt/aktuelle-information-zum-kraftwerksbau.
40	Tiroler Wasserkraft, Kühtai mit speicher Finstertal und Längental, (n.d.); www.tiroler-wasserkraft.at%2Fde%2Fhn%2Fwasserkraftausbau%2Fspeicherkraftwerk_kuehtai%2Fprojektgebiet%2Fkuehtai%2Findex.php&anno=2.
41	Trans-Sibirskaya hydro proposed on Shilka river, (n.d.); http://www.transrivers.org/asian-rivers-spatial-information-system/trans-sibirskaya-hydro-proposed-on-shilka-river/.
42	Verbund, Gratkorn run-of-river power plant (2014); http://www.verbund.com/pp/en/run-of-river-power-plant/gratkorn.
43	Verbund, Graz puntigam run-of-river plant, (n.d.); http://www.verbund.com/pp/en/run-of-river-power-plant/graz-puntigam.
44	Verbund, Gries run-of-river power plant, (2014); http://www.verbund.com/pp/en/run-of-river-power-plant/gries.
45	Verbund, Inn joint-venture run-of-river power plant, (n.d.); http://www.verbund.com/pp/en/run-of-river-power-plant/inn-joint-venture-power-plant.
46	Verbund, Laufkraftwerk Stegenwald, (n.d.); http://www.verbund.com/pp/de/laufkraftwerk/stegenwald.
47	Verbund, Riedl energy storage plant, (n.d.); http://www.verbund.com/pp/en/pumped-storage-power-plant/riedl.
48	Verbund, Stübing run-of-river plant (n.d.); http://www.verbund.com/pp/en/run-of-river-power-plant/stuebing.
49	Vorarlberger Illwerke Ag, Projekt rellswerk (2010); http://www.illwerke.at/inhalt/at/992.htm.
50	Wasserkraft, Hydropower development, (n.d.); http://www.optionenbericht.at/&prev=/search%3Fq%3DMalfon%2Bkraftwerk%26client%3Dfirefox-a%26hs%3DmDB%26sa%3DN%26rls%3Dorg.mozilla:de:official%26channel%3Dfflb%26biw%3D1920%26bih%3D1069.
51	Work at Baraj Dam , (2007); http://www.panoramio.com/photo/4537055.
52	World Energy Council, Hydropower in Russia, (n.d. ); http://www.worldenergy.org/data/resources/country/russia/hydropower.

## Sheet: Table S1 - Africa
Table S1. List of 359 references for compiled future hydropower dam data.
Africa
1	African Development Bank Group, “"Kandadji" ecosystems regeneration and Niger valley development programme detailed environmental and social impact assessment” (African Development Bank Group, Tunisia, 2008); http://www.afdb.org/fileadmin/uploads/afdb/Documents/Environmental-and-Social-Assessments/ADF-BD-IF-2008-50-EN-NIGER-ESIA-KANDADJI-ECOSYSTEMS-REGENERATION-AND-NIGER-VALLEY-DEVELOPMENT-PROGRA…
2	African Development Bank Group, “Strategic environment and social assessment summary” (African Development Bank Group, Tunisia, n.d.); http://www.afdb.org/fileadmin/uploads/afdb/Documents/Environmental-and-Social-Assessments/EESS-Renouvelable%20et%20PERG-Resume_English.pdf.
3	African Manager, IFC grants US$ 2m for Mali's proposed hydroelectric dam, (n.d.); http://www.africanmanager.com/site_eng/detail_article.php?art_id=16684.
4	African Spotlight, South Sudan to build hydropower dam along Nile river, (2011); http://africanspotlight.com/blog/2011/09/27/south-sudan-to-build-hydropower-dam-along-nile-river/.
5	Artelia, “New Assiut dam and hydropower plant” (Artelia, New Cairo, Egypt, 2012); http://www.arteliagroup.com/sites/default/files/projet/fichesPDF/en/energy/energie_hydroelec_egy_new_assiut_dam_hydropower_plant.pdf.
6	Association of Power Producers of Ontario, Investment opportunity awaits in Kenya and East Africa, (n.d.); http://magazine.appro.org/index.php?option=com_content&task=view&id=1379&Itemid=44.
7	Aurecon, “Proposed hydropower station on the farm Riemvasmaak (remainder of farm no. 497 and portion of farm no. 498) on the Orange river in the vicinity of Augrabies falls national park Northern Cape ” (Aurecon, Pretoria, South Africa, 2013); http://aurecon.webfoundryza.com/assets/files/108361%20Riemvasmaak/Riemvasmaak%20FSR_ver3.pdf.
8	Aurecon, “Proposed run of the river hydropower station and associated infrastructure on the Orange river near onseepkans Northern Cape: Availability of the draft scoping report” (Aurecon, Pretoria, South Africa, 2013); http://aurecon.webfoundryza.com/assets/files/109903%20Orange%20Falls%20Hydro/Eng~Non%20Tech%20Sum%20281013.pdf.
9	A. Bartle, R. Taylor, Hydropower and Dams World Atlas and Industry guide. Aqua-Media International, (2012).
10	J. V. Bod, Cfaf 85 billion to construct warak bini dam, (2012); http://www.businessincameroon.com/?option=com_k2&view=item&id=3561:cfaf-85-billion-to-construct-warak-bini-dam&Itemid=465&tmpl=component&print=1.
11	H. Chambal, “Energy security in Mozambique” (International Institute for Sustainable Development, Manitoba, Canada, 2010); http://www.iisd.org/tkn/pdf/energy_security_mozambique.pdf.
12	China National Eletric Engineering Co Ltd, The successful signing of epc contract of Zungeru hydro-power plant in Nigeria, (2013); http://www.cneec.com.cn/NewsCenter/NewsCenter/CNEECNews/201301/1755.html.
13	Club Des Amis D'allemagne, Factbox Cameroon energy projects (n.d.); http://caa-cam.org/index.php?pid=292.
14	Common Market for Eastern and Southern Africa, “Songwe river basin development programme project profile” (Common Market for Eastern and Southern Africa, Lusaka, Zambia, 2013); http://www.comesa.int/attachments/article/842/Songwe%20River%20Basin%20Development%20%20Programme%20-%20Project%20Profile%20-%2019052013%20-%20Draft%201.pdf.
15	Econ Centre for Economic Analysis, “Environmental impact statement for Nyagak minihydro” (Econ Centre for Economic Analysis, Oslo, Norway, 2005); http://www.lindhjem.info/Nyagak%20EIA%20_revised%20ver2_.pdf.
16	Ecowas Observatory for Renewable Energy and Energy Efficiency, (n.d.); http://www.ecowrex.org/.
17	Electricity Regulatory Authority, Application for a license for the establishment of a 44.7MW hydro power plant in Kibaale district, (2014); http://www.era.or.ug/index.php/2013-10-23-18-03-21/2013-10-23-18-12-48/notices/281-application-for-a-license-for-the-establishment-of-a-44-7mw-hydro-power-plant-in-kibaale-district.
18	Energy Business Review, Cameroon signs $1bn hydro power project deal, (2012); http://hydro.energy-business-review.com/news/cameroon-signs-1bn-hydro-power-project-deal-120312.
19	Enviroworks, “Proposed Slypsteen hydroelectric power scheme background information document” (Enviroworks, Cape Town, South Africa, 2013); http://www.sahra.org.za/sites/default/files/additionaldocs/Deelfontein%20%28Slypsteen%29%20Hydro%20-%20Background%20Information%20Document.pdf.
20	Enviroworks, “Proposed Torquay hydroelectric power scheme background information document” (Enviroworks, Cape Town, South Africa, 2013); http://www.sahra.org.za/sites/default/files/additionaldocs/Tullochgorum%20%28Torquay%29%20Hydro%20-%20Background%20Information%20Document.pdf.
21	FAO Representative Office in Uganda, “Water infrastructure in the Nile basin” (FAO Representative Office in Uganda , Kampala, n.d.); http://www.fao.org/nr/water/faonile/WaterInfrastructure.pdf.
22	Food and Agriculture Organisation, Aquastat – geo-referenced database on African dams, (2013); http://www.fao.org/nr/water/aquastat/dams/index.stm.
23	E. Hartvigsson, “Technical and economical evaluation of hydropower grid connection in Burundi” (Chalmers University of Technology, Gothenburg, Sweden, 2012); http://publications.lib.chalmers.se/records/fulltext/169770/169770.pdf.
24	K. Hassaballah, A. Jonoski, I. Popescu, D. P. Solomatine, Model-based optimization of downstream impact during filling of a new reservoir: Case study of Mandaya/Roseires reservoirs on the Blue Nile river. Water Resource Management 26, 273 (2012/01/01, 2012).
25	C. Hillmann, L. T. Trædal, “The Mepanda Unkua project – a planned regulation of the Zambezi river in Mozambique” (FIVAS, Oslo, Norway, 2003); http://www.fivas.org/fivas/vedlegg/mepandaunkua_04.09.2007_10.27.28.pdf.
26	Hydroworld, Uganda seeks geotechnical consultants for 4.36-mw Nyagak 3 mini hydro project, (2013); http://www.hydroworld.com/articles/2013/01/uganda-seeks-geotechnical-consultants-for-436-mw-nyagak-3-mini-h.html.
27	Iliso Consulting (PTY) Ltd, “1 000 mw Kobong pumped storage scheme on the Katse dam reservoir - public health impact assessment report ” (Iliso Consulting , Highveld, South Africa, 2012); http://www.iliso.com/images/kobong/7.pdf.
28	Independent Newspapers Limited, Planned power projects will beat Southern Aafrica’s energy blues, (2012); http://www.iol.co.za/business/features/planned-power-projects-will-beat-southern-africa-s-energy-blues-1.1305571#.UujPZ4YwdGF.
29	International Bank for Reconstruction and Development, “Notice of registration” (International Bank for Reconstruction and Development, Washington, USA, 2010); http://www-wds.worldbank.org/external/default/WDSContentServer/WDSP/IB/2010/06/25/000334955_20100625011221/Rendered/PDF/552690IPNR0P09101Official0Use0Only1.pdf.
30	International Hydropower Association, “IHA hydropower report” (International Hydropower Association, London, 2013); http://hydropower.org/news/files/iha-hydropower-report-2013.html.
31	International Office for Water, Ecowas Water Resources Coordination Center, Prioritizing large dams projects in the West African region, (Sophia Antipolis, France & Ouagadougou, Burkina Faso, 2013); http://wikhydro.developpement-durable.gouv.fr/index.php/Prioritizing_large_dams_projects_in_the_West_African_region/en.
32	International Rivers, Berkeley, CA; http://www.internationalrivers.org.
33	M. Kappiah et al., “Workshop report: Ecowas regional workshop on small scale hydro power” (ECOWAS Regional Centre for Renewable Energy and Energy Efficiency, Praia, Cape Verde,2012); http://www.ecreee.org/sites/default/files/workshop_report_part_1_-_proceedings.pdf.
34	W. J. Klunne, African hydropower database, (n.d.); http://www.hydro4africa.net/HP_database/.
35	Kyoto Protocol's Clean Development Mechanism (CDM), Project cycle database,, (2013); http://cdm.unfccc.int/Projects/projsearch.html.
36	C. R. L. You, G. Nelson, U. Wood-Sichra, R. Robertson, S. Wood, G. Zhe, T. Zhu, and Y. Sun, “Torrents and trickles: Irrigation spending needs in Africa” (The International Bank for Reconstruction and Development, Washington, USA, 2009); http://infrastructureafrica.org/system/files/library/2011/05/BP09_Irrig_spdg_xctry_annex.pdf.
37	A. Lafleur, S. Lindley,SRESA of a regional transmission development in Mozambique, paper presented at the 33rd Annual Meeting of the International Association for Impact Assessment, 16 May, 2013; http://www.iaia.org/conferences/iaia13/proceedings/Final%20papers%20review%20process%2013/SRESA%20of%20a%20Regional%20Transmission%20development%20in%20Mozambique.pdf?AspxAutoDetectCookieSupport=1
38	P. G. J. Lapukeni, “Status of energy policy in Malawi” (Ministry of Natural Resources, Energy and Environment, Malawi, Lilongwe, 2013); http://eneken.ieej.or.jp/data/5006.pdf.
39	G. Lenckonov, Relance du projet de construction du barrage de chollet (2012); http://www.congo-site.com/Relance-du-projet-de-construction-du-barrage-de-Chollet_a13390.html.
40	Lesotho Highlands Development Project, Overview of the Lesotho highlands water project, (n.d.); http://www.lhwp.org.ls/overview/default.htm.
41	Ø. Løvstad, “Transboundary water management the case of the Kikagati/Murongo hydropower development project” (Faculty of Natural Science and Technology, Norweigen University of Science and Technology, Trondheim, Norway, n.d.); http://www.ntnu.no/documents/10443/21424885/%C3%98istein+L%C3%B8vstad.pdf/f907f01b-6475-4711-a0d2-ea53a5667ca7.
42	K. P. Luteganya, S. M. Kizzy, “Pangani river basin flow assessment” (Pangani Basin Water Board and International Union for Conservation of Nature, Nairobi, Kenya, 2009); http://cmsdata.iucn.org/downloads/hydroelectric_power_modelling_1.pdf.
43	R. Mansaray, “Hydropower development in Sierra Leone” (ECOWAS Regional Centre for Renewable Energy and Energy Efficiency, Praia, Cape Verde, 2012); http://www.ecreee.org/sites/default/files/sierra_leone.pdf.
44	M. P. Mccartney, For large dam planning and operation in Africa. (2007).
45	Ministry of Irrigation and Water Resource Management, Social and environmental assessment (sea) report Nyamwamba small hydropower project, Uganda, (2010); http://www.crdcecbsl.lk/Special%20Projects/documents/Kilembe-Ex.Sum%20Sept%202010.docx.pdf.
46	Ministry of Water and Energy Ethiopia, Baro and Karadobi hydropower projects, (n.d.); http://www.mowr.gov.et/index.php?pagenum=1.1&pagehgt=910px.
47	P. Minoia, A. Brusarosco, Water infrastructures facing sustainable development challenges: Integrated evaluation of impacts of dams on regional development in Morocco, (2006); http://ageconsearch.umn.edu/bitstream/12141/1/wp060105.pdf.
48	F. Misser, Energy in Africa - hydroelectric giants, (2011); http://www.southworld.net/newtest/index.php/component/k2/item/134-energy-in-africa--giants.
49	B. Ndinwa, Mekin dam project kicks off early 2013, (n.d.); http://diasporacamerounaise.com/index.php/politique/208-mekin-dam-project-kicks-off-early-2013-paul-biya.
50	New Vision Online, Turkish company to build Ayago dam, (2013); http://www.newvision.co.ug/news/641880-turkish-company-to-build-ayago-dam.html.
51	Niger basin renews call for study design of 90-Mw Fomi, (2011); http://www.hydroworld.com/articles/2011/03/niger-basin-renews-call-for-study-design-of-90-mw-fomi.html.
52	P. Nyakazeya, Zimbabwe: Gairezi power project progresses, (2013); http://allafrica.com/stories/201302211161.html.
53	F. W. Okello, R. Elema, Museveni makes pledge on Yumbe waterfalls, (2013); http://www.monitor.co.ug/News/National/Museveni-makes-pledge-on-Yumbe-waterfalls/-/688334/1688592/-/nt6v1lz/-/index.html.
54	B. Okethwengu, West nile to get 5 megawatts dam, (2012); http://www.newvision.co.ug/news/633559-west-nile-to-get-5-megawatts-dam.html.
55	Programme for Infrastructure Development in Africa, Palambo dam project, (n.d.); http://www.au-pida.org/node/156.
56	Public Agenda, Four hydro-dams in the pipeline, (2005); http://www.modernghana.com/news/72421/1/four-hydro-dams-in-the-pipeline.html.
57	P. Reynolds, Sizing up African hydro, (2011); http://www.waterpowermagazine.com/features/featuresizing-up-african-hydro.
58	N. R. Richardson, “Feasiblity study for the development of a mini-hydro powerplant irrigation and gravity water supply schemes for the people of the flat lands of the Western rift valley along the Eastern shore of lake Albert” (Agricultural Cooperative Development International & Volunteers in Overseas Cooperative Assistance, Washington, USA, 1997); http://pdf.usaid.gov/pdf_docs/PNACB843.pdf.
59	O. Rosnes, H. V. E. Pöyry, “Powering up: Costing power infrastructure spending needs in Sub-Saharan Africa” (The International Bank for Reconstruction and Development, Washington, USA, 2009); http://infrastructureafrica.org/system/files/BP5_PowerSpending_maintxt%20new.pdf.
60	A. Ruhweza, B. Biryahwaho, C. Kalanzi, “An inventory of pes schemes in Uganda” (East and Southern Africa Katoomba Group, Cape Town, South Africa, 2008); http://www.katoombagroup.org/regions/africa/documents/2008_Uganda_Inventory.pdf.
61	L. Rupley, L. Bangali, B. Diamitani, Historical dictionary of Burkina Faso. (Scarecrow Press, Inc., 2013).
62	Z. Sambu, State plans two more hydro-electric power dams on Tana river (2012); http://www.businessdailyafrica.com/State-plans-two-more-hydroelectric-power-dams-on-Tana-River-/-/539546/1421362/-/fd4c4tz/-/index.html.
63	Sinohydro, Ivory coast, Soubre HPP, (n.d.); http://eng.sinohydro.com/index.php?m=content&c=index&a=show&catid=42&id=172,%20http://china.aiddata.org/s/30121.
64	Snc Lavalin International Inc, Parsons Brinckerhoff, “Regional power system master plan and grid code study ” (Snc Lavalin International Inc, Quebec, Canada, 2011); http://www.eappool.org/eng/pub/masterplan/Final%20Master%20Plan%20Report%20Appendix%20B%20Part%20II.pdf.
65	Studio Pietrangeli, Rumakali (tanzania), (n.d.); http://www.pietrangeli.com/Rumakali.
66	M. Tekleberhan, Dam at Kesem sugar irrigation project successfully retains water, (2012); http://www.2merkato.com/201209191611/dam-at-kesem-sugar-irrigation-project-successfully-retains-water.
67	The Curious Case of Electricity Dearth in Tanzania, (2010); http://www.vijana.fm/2010/12/17/electricity-dearth-in-tanzania/.
68	Trønderenergi AS, “Kikagati hydro power plant call for expression of interest” (Trønderenergi AS, Trondheim, Norway, n.d.); https://kgv.doffin.no/app/.../downloadPublicDocument.asp?
69	United Nations Environment Programme, Africa water atlas. (Division of Early Warning and Assessment (DEWA), United Nations Environment Programme (UNEP), Nairobi, Kenya., 2010).
70	Water Resources Coordination Centre, “Dialogue on large water projects in the ecowas region” (ECOWAS Regional Centre for Renewable Energy and Energy Efficiency, Praia, Cape Verde, 2011); http://www.google.de/url?sa=t&rct=j&q=&esrc=s&source=web&cd=1&ved=0CCcQFjAA&url=http%3A%2F%2Fwww.dialoguebarrages.net%2Fen%2Fdocuments-and-ressources%2Fdoc_download%2F107-evaluation-of-and-discussion-on-priority-…
71	World Bank, Environmental and social review summary for Uganda renewable energy development program – rwimi hydropower project, (2014); http://www-wds.worldbank.org/external/default/WDSContentServer/WDSP/IB/2014/02/11/000442464_20140211115341/Rendered/INDEX/E44440V10AFR0E00Box382146B00PUBLIC0.txt.
72	World Bank, “Etude d'impact environnemental et social. Vol. 10 of Niger - first part of the second phase of the Niger basin water resources development program project : Environmental assessment” (World Bank, Washington, USA, 2012); http://documents.worldbank.org/curated/en/2012/01/15818215/niger-first-part-second-phase-niger-basin-water-resources-development-program-project-environmental-assessm…
73	World Energy Council, “2010 survey of energy resources ” (World Energy Council, London, United Kingdom, 2010); http://www.worldenergy.org/documents/ser_2010_report_1.pdf.
74	Zambezi River Authority, Mupata gorge hydroelectric scheme, (n.d.); http://www.zaraho.org.zm/mupata-gorge.html.
75	Zimbabwe Investment Authority, Batoka gorge hydro power station, (n.d.); http://www.comesaria.org/site/en/opportunities_details.php?chaine=batoka-gorge-hydro-power-station&id_opportunities=430&id_article=290.

## Sheet: Table S1 - Asia
Table S1. List of 359 references for compiled future hydropower dam data.
Asia
1	Akenerji Elektrik Üretim A.Ş, “The Yamanli iii hydroelectric power plant project, livelihood restoration plan” (Akenerji Elektrik Üretim A.Ş, Ankara, Turkey, 2011); http://www.akenerji.com.tr/_UserFiles/File/Surdurulebilir/YAMANLI%20III_LRP_Report_rv01_09.06.11.pdf.
2	Akışkan Mühendislik Limited, Bucakköy HES uygulama projelerİ (n.d.); http://www.akiskanmuhendislik.com/projegoster.php?projeID=30.
3	Aksa Enerji, “Faalİyet raporu” (Aksa Enerji, Istanbul, Turkey, 2010); http://www.aksa.com.tr/upload/docs/e6ff634e-a0df-4507-9a64-1bd0d2a7fece/e6ff634e-a0df-4507-9a64-1bd0d2a7fece.pdf.
4	Aksu Deresi Koruma Birliği, Basın açıklaması ve duruşma (n.d.); http://translate.google.de/translate?hl=en&sl=tr&u=http://www.aksuderesikoruma.org/&prev=/search%3Fq%3D%25C2%25A0AKSU%2Bhes%26hl%3Den%26biw%3D1920%26bih%3D1069&sa=X&ei=ex5HUdLXG434sgb4voGwBg&ved=0CDgQ7gEwAQ.
5	“Alara Baraji Ve HES”, (n.d.); http://www.hepp.com.tr/testi/hes/alara.pdf.
6	Alarko Group, Energy group - generation, (n.d.); http://www.alarko.com.tr/eng/faaliyet_gruplari_eng.asp?id=54.
7	Arakan Rivers Network, Sai dun hydropower plant, (n.d.); http://www.arakanrivers.net/?page_id=184.
8	C. Arpi, Chinese dams in Burma (2011); http://claudearpi.blogspot.de/2011/06/chinese-dams-in-burma.html.
9	M. Barker, E. Chong, G. P. Khong, P. Robinson, “ Feasibility study for the Baleh hydroelectric project” (GHD Pty Ltd, Brisbane, Australia, 2010); http://www.ghd.com/PDF/2010%20HP&D%20Asia%20-%20Feasibility%20Study%20for%20Baleh%20Hydroelectric%20Project%20-%20BARKER%20et%20al.pdf.
10	A. Bartle, R. Taylor, Hydropower and Dams World Atlas and Industry guide. Aqua-Media International, (2012).
11	Baysan Elektrİk Üretİm A.Ş., Rüzgarlı i-ii regülatörü ve HES, (n.d.); http://translate.google.co.uk/translate?hl=en&sl=tr&u=http://www.pustiler.com/TR/projeler/devam-eden-projeler/item/46-r%25C3%25BCzgarli-i-ii-reg%25C3%25BClat%25C3%25B6r%25C3%25BC-ve-hes-projesi.html&prev=/search%3Fq%3D%25C2%25A0R%25C3%259CZGARLI%2BREG.%2BVE%2BHES%26hl%3Den%26safe%3Doff%26biw%3D1138%26bih%3D525&sa=X&ei=W6hZUdntL…
12	Bereket Enerji, HES çirakdami, (n.d.); http://translate.google.de/translate?hl=en&sl=tr&u=http://www.bereketenerji.com.tr/BACKUP/crakdam-hes.html&prev=/search%3Fq%3D%25C3%2587IRAKDAMI%26hl%3Den%26gl%3Dde%26biw%3D1920%26bih%3D1069&sa=X&ei=v2tIUczaD8nYtAai7YC4CA&ved=0CDAQ7gEwAA.
13	Bilgin Energy Investment Holding Co Ltd, Bucakkisla regulator and hydroelectric power plant, (n.d.); http://translate.google.de/translate?hl=en&sl=tr&u=http://www.bilgin.com.tr/bucakkisla.asp%3Fide%3Dbucakkisla&prev=/search%3Fq%3D%25C2%25A0BUCAKKI%25C5%259ELA%2Bhes%26hl%3Den%26biw%3D1920%26bih%3D1069&sa=X&ei=kRlHUbSbLo3XsgbIt4GoCA&ved=0CEYQ7gEwAw.
14	Bruno Manser Fonds, “Baram dam expected flooded area” (Bruno Manser Fonds, Basel, Switzerland, 2012); http://stop-corruption-dams.com/resources/Baram_Dam_Flooded_Area.pdf.
15	Bruno Manser Fonds, “FAQ for proposed Baram dam” (Bruno Manser Fonds, Basel, Switzerland, n.d.); http://stop-corruption-dams.com/resources/SEB_FAQ_for_Proposed_Baram_Dam.pdf.
16	Burma Rivers Network, “Damming the Irrawaddy” (n.d.); http://www.burmariversnetwork.org/images/stories/publications/english/dammingtheirrawaddy.pdf.
17	Burma Rivers Network, Irrawaddy/n'mai/mali dams, (2008); http://burmariversnetwork.org/index.php/dam-projects/irrawaddynmaimali.
18	Burma Rivers Network, Map of dams in Burma, (n.d.); http://www.burmariversnetwork.org/component/content/article/138.html.
19	Burma Rivers Network, Upper thanlwin dam, (2008); http://burmariversnetwork.org/index.php/dam-projects/salween-dams/upper-thanlwin.
20	Burma Rivers Network, Weigyi dam, (2008); http://burmariversnetwork.org/index.php/dam-projects/salween-dams/weigyi.
21	Çalik Enerjİ Elektrİk Üretİm Ve Madencİlİk A.Ş., “Kizkayasi baraji ve hİdroelektrİk santrali (126,36 mwe/130 mwm) projesİ” (Çalik Enerjİ Elektrİk Üretİm Ve Madencİlİk A.Ş, Istanbul, Turkey, 2011); http://www.cedgm.gov.tr/CED/Files/cedsureci/inceleme_degerlendirme_sureci/451%20ids.pdf.
22	Ceylon Today, Construction work to start after 2015 (2012); http://www.ceylontoday.lk/51-14324-news-detail-construction-work-to-start-after-2015.html.
23	Chandrashekhara, The strongest takes all, (2010); http://chandrashekharasandprints.wordpress.com/2010/04/11/the-strongest-takes-all/.
24	China Daily, Experts fight to plug up dam project, (2009); http://www.china.org.cn/environment/2009-11/12/content_18871906.htm.
25	China International Water and Electric Corporation, Baihetan hydropower project, (n.d.); http://english.cwe.cn/show.aspx?id=1828&cid=43.
26	China valves technology receives purchase orders for Tibet Pangduo hydro project and South-to-North water diversion project, (2011); http://www.prnewswire.com/news-releases-test/china-valves-technology-receives-purchase-orders-for-tibet-pangduo-hydro-project-and-south-to-north-water-diversion-project-123806839.html.
27	Chinese National Committee on Large Dams, Dam information (n.d.); http://www.chincold.org.cn/dams.asp.
28	Cmb Enerji, İspİr dam and HEPP, (n.d.); http://www.torukotoushi.jp/docs/category7/category7_832.PDF.
29	C. C. Company, HES Arpacay, (n.d.); http://translate.google.de/translate?hl=en&sl=tr&u=http://cemberinsaat.com/index.php/tr/projelerimiz/96-projelerimiz/devam-eden-projeler/126-cember-apracay-hes.html&prev=/search%3Fq%3D%25C2%25A0ARPA%25C3%2587AY%2Bhes%26hl%3Den%26biw%3D1920%26bih%3D1069&sa=X&ei=Sv5KUebMA4jdsgbonYDYBQ&ved=0CEkQ7gEwAw.
30	Daily Times, France to finance 48mw Jagran-ii hydropower project, (2012); http://www.dailytimes.com.pk/default.asp?page=2012\07\07\story_7-7-2012_pg5_10.
31	Doğa Derneği, Dams database, (n.d.), Istanbul; http://www.dogadernegi.net/.
32	Doğru Engineering Limited Corporate, (n.d.); http://www.dogrumuhendislik.com.tr/zincirlien.html.
33	Doğru Engineering Limited Corporate, Aslancik dam and hydroelectric power plant, (n.d.); http://www.dogrumuhendislik.com.tr/aslanciken.html.
34	Dokay-Eia Environmental Engineering Ltd, “Kavsak bendi hydroelectric power plant capacity increase project environmental impact assessment report” (Dokay-Eia Environmental Engineering Ltd, Istanbul, Turkey, 2009); http://www.enerjisa.com.tr/en-US/Generation/OurProjects/ProjectDocuments/KavsakBendi_EIA_Report_En.pdf.
35	Dolsar Engineering Ltd, Introduction file for the capacity increase project within the Arkun dam and HEPP project, (Dolsar Engineering Ltd, Ankara, Turkey, 2010); http://www.enerjisa.com.tr/en-US/Generation/OurProjects/ProjectDocuments/Arkun-CapacityPDR_EN.pdf.
36	S. Dorji, “Environment impacts and safeguards for safeguards for Punatsangchhu ii hydroelectric project” ( Punatsangchhu-II hydroelectric project authority, Thumpu, Bhutan, 2011); http://www.globaltigerinitiative.org/download/Bhutan/TS4_Hydropower_Bhutan_31May2011.pdf.
37	Druk Green Power Corporation, Projects, (n.d.); http://www.drukgreen.bt/Content2.aspx?c=114.
38	R. Dutta, S. K. Sarma, “Lower Subansiri hydroelectric power project and future of the Subansiri river ecosystem” (Department of Botany, Gauhati University, Assam, India, 2012); http://scholarsresearchlibrary.com/ABR-vol3-iss6/ABR-2012-3-6-2953-2957.pdf.
39	E.R.T. Construction, Cemel-2 HEPP, (n.d.); http://translate.google.de/translate?hl=en&sl=tr&u=http://ertinsaat.com.tr/en/onproject.aspx%3FprojectId%3D10&prev=/search%3Fq%3D%25C2%25A0AVANOS.
40	Eaydin Engineering Consulting, “Technical due diligence of a project portfolio with 10 HEPPS” (Eaydin Engineering Consulting, Istanbul, Turkey, 2006); http://eaydin.com/docs/visuals/14_PIS_ENDA_ENG.pdf.
41	Eekkoll Elektrİİİk Üretİm Dağitim San.Ve Tİc A.Ş., “Burgullar--gebeş regüllattör ve HES” (2011); http://www.cedgm.gov.tr/CED/Files/cedsureci/inceleme_degerlendirme_sureci/596_ids.pdf.
42	E. Egidarev, Dams in Amur river basin database, (2012); http://amur-heilong.net/vicarr/object.php?action=show&id=201.
43	Electrical Industry of Burma/Myanmar on-Line Compendium, (2012); http://www.burmalibrary.org/docs2/ELEC-Burma-4th-edition.pdf.
44	Enerjisa Group, Enerjisa takes over the 204 mw Alpaslan 2 dam and HEPP, (2011); http://www.enerjisa.com.tr/en-US/Media/Pages/PressBulletin_84.aspx.
45	Enerjisa Group, Sarigüzel dam and hydroelectric power plants (Enerjisa Group , Istanbul, Turkey, 2011); http://www.netinform.de/KE/files/pdf/VCS%20PD_SariguzelHES_270611.pdf.
46	A. V. Estabillo, Another submersion case in proposed central Mindanao hydropower dam?, (n.d.); http://www.aseanenvironment.info/News/44000867.htm.
47	Four bidders for Iran’s ostour Dam, (1999); http://www.waterpowermagazine.com/news/newsfour-bidders-for-iran-s-ostour-dam/.
48	Garanti Securities, “New horizons in generation...” (Garanti Securities , Istanbul, Turkey, 2008); http://report.paragaranti.com/arastirma/Arastirma_pg/AYEN_240308.pdf.
49	General directorate of state hydraulic works, HEPP database, (2013); http://www.dsi.gov.tr/.
50	Göçen HES, (2011); https://maps.google.com/maps/ms?ie=UTF8&t=h&vpsrc=6&oe=UTF8&msa=0&msid=201910395144572698983.0004b2e0e33e84e3fd84b.
51	Government of Nepal Ministry of Energy, Issued licenses, (2012); http://www.doed.gov.np/issued_licenses.php.
52	Güneş Gazetesi, Bolaman hes.Projesİnde gelİnen son aşama., (n.d.); http://translate.google.de/translate?hl=en&sl=tr&tl=en&u=http%3A%2F%2Fwww.gunesgazetesi.net%2Fkoseyazilari%2F2167%2F2090%2Fosman-guvenalp-bolaman-hesprojesinde-gelinen-son-&anno=2.
53	Güneyce Baraji Ve HES, (n.d.); http://www.hepp.com.tr/testi/baraj/guneyce.pdf.
54	Haber3, Ordu'da çevrecİler HES İçİn toplandi, (2011); http://translate.google.de/translate?hl=en&sl=tr&tl=en&u=http%3A%2F%2Fwww.haber3.com%2Forduda-cevreciler-hes-icin-toplandi-1119787h.htm&anno=2.
55	HES in Temeli Atılıyor, (2008); http://translate.google.co.uk/translate?hl=en&sl=tr&u=http://www.boyabatgazetesi.com/%3Fsubaction%3Dshowfull%26id%3D1215567119%26archive%3D1231432990%26start_from%3D%26ucat%3D1%26&prev=/search%3Fq%3D%25C2%25A0BOYABAT-KEPEZ%2Bhes%26hl%3Den%26biw%3D1920%26bih%3D1069&sa=X&ei=kQhHUfDdKI3otQaHt4HgCg&ved=0CDoQ7gEwAQ.
56	Hidro Dizayn, “Alpaslan ii dam and HEPP” (Hidro Dizayn, Ankara, Turkey, n.d.); http://www.hidrodizayn.com/images/projepdf/D_Alpaslan%20II%20Baraj%C4%B1%20ve%20HES_Mu%C5%9F.pdf.
57	Hidrokon Mühendislik Müsavirlik A.S., Kaya baraji ve HES, (n.d.); http://www.hidrokonmuhendislik.com.tr/en/14/anIIcat_3/7/anIIitm_3/45.
58	S. M. Husain, N. N. Rai, One dimensional dam break flood analysis for Kameng hydroelectric project, (n.d.); www.syke.fi/download/noname/%7B621361C0-1F2A-4B1F.../77232.
59	Hydro Review, Drilling work begins at 1,900-mw Kambarata 1 hydropower plant, (2013); http://www.hydroworld.com/articles/2013/08/drilling-work-begins-at-1-900-mw-kambarata-1-hydropower-plant.html.
60	Hydro Review, Mongolia seeks feasibility study plan for 300 mw Shuren hydropower project, (2013); http://www.hydroworld.com/articles/2013/05/mongolia-seeks-feasibility-study-plan-for-300-mw-shuren-hydro-pr.html.
61	Hydro Review, Myanmar signs Thai Singapore firms to build 600-mw Taninthayi, (2008); http://www.hydroworld.com/articles/2008/10/myanmar-signs-thai-singapore-firms-to-build-600-mw-taninthayi.html.
62	Hydrochina Zhongnan Engineering Corporation, Tuoba hpp, (2010); http://en.msdi.cn/69808_1.view.
63	Ilk Enerji, Ayancik project, (n.d.); http://translate.google.de/translate?hl=en&sl=tr&u=http://www.ilkenerji.com.tr/ayancik_projesi.aspx&prev=/search%3Fq%3Dayancik%2Bhes%26hl%3Den%26biw%3D1920%26bih%3D1069&sa=X&ei=e8JJUbSjJcyZhQfOzYDwDw&ved=0CDMQ7gEwAA.
64	International Hydropower Association, “IHA hydropower report” (International Hydropower Association, London, 2013); http://hydropower.org/news/files/iha-hydropower-report-2013.html.
65	International Rivers, Berkeley, CA; http://www.internationalrivers.org.
66	Iran Water and Power Resources Development Company, Bakhtiari project, (n.d.); http://en.iwpco.ir/Bakhtiari/default.aspx#.
67	Iran Water and Power Resources Development Company, Upper Gotvand project, (n.d.); http://en.iwpco.ir/Gotvand/default.aspx.
68	Iran Water Power Resources Development Company, Khersan 3, http://en.iwpco.ir/Khersan3/default.aspx.
69	Islamic Republic of Afghanistan Ministry of Energy and Water, Renewable energy, (2013); http://arbm-mew.gov.af/renewable-energy/.
70	Japan Dam Foundation, Dams in Japan, Tokyo, Japan; http://damnet.or.jp/Dambinran/binran/TopIndex_en.html.
71	Japan Dam Foundation, Isawa dam, (n.d.); http://damnet.or.jp/cgi-bin/binranA/enAll.cgi?db4=0277.
72	Japan Dam Foundation, Tono, (n.d.); http://damnet.or.jp/cgi-bin/binranA/enAll.cgi?db4=2554.
73	Kadıncık - Iii HES - Google Maps, (2011); https://maps.google.com/maps/ms?mpa=0&ctz=-120&mpf=0&ie=UTF8&t=p&vpsrc=0&oe=UTF8&msa=0&msid=201442154569321987064.0004b265ec4a8793fdb69.
74	Kadıncık Iv HES - Google Maps, (2011); https://maps.google.com/maps/ms?mpa=0&ctz=-120&mpf=0&ie=UTF8&t=p&vpsrc=0&oe=UTF8&msa=0&msid=201442154569321987064.0004b265f5cd137464137.
75	Karabük Net News, Dsi's sucat HES report, (2013); http://translate.google.de/translate?hl=en&sl=tr&u=http://www.karabuknethaber.com/dsinin-sucati-hes-.
76	Kavar Dam - Panoramio, http://www.panoramio.com/photo/37012704.
77	H. Korkmaz, A. Engin, The flora of the Boyabat (sinop) dam and its environs. Turk. J. Bot 25, 397 (2001).
78	Köylüler HES Barajı Şantiyesini Bastı, (2012); http://www.cnnturk.com/2012/turkiye/05/21/koyluler.hes.baraji.santiyesini.basti/661792.0/index.html.
79	A. Kramer, Turkey's water policy. (Springerverlag Berlin Heidelberg, 2011).
80	R. Kumar et al., “Concreting at low ambient temperatures at Salma dam project Afghanistan-a case study” (Central Soil and Materials Research Station, New Delhi, India, 2014); http://www.ijetae.com/files/Volume4Issue2/IJETAE_0214_156.pdf
81	Kyoto Protocol's Clean Development Mechanism (CDM), Project cycle database, (2013); http://cdm.unfccc.int/Projects/projsearch.html.
82	S. Lawrence, “Power surge the impacts of rapid dam development in Laos” (International Rivers, Berkeley, USA, 2008); http://de.scribd.com/doc/25203691/15/CASE-STUDy-SEVEN-Nam-Kong-1-Hydropower-Project.
83	A. Light, I could not get in üzümdere HES meeting, (2012); http://translate.google.co.uk/translate?hl=en&sl=tr&u=http://manavgathaberi.com/uzumluderede-hes-toplantisi-yaptiramadik&prev=/search%3Fq%3D%25C3%25BCz%25C3%25BCmdere%2Bk%25C3%25B6y%25C3%25BC%2Bhes%26hl%3Den%26biw%3D1920%26bih%3D1069&sa=X&ei=I0tIUfHbMIKM.
84	Maunsell Limited & Lahmeyer Gmbh, “Power system development plan for Lao pdr: Volume c: Project catalogue” (Maunsell Limited, Auckland, New Zealand, 2004); http://siteresources.worldbank.org/INTLAOPRD/491761-1094074854903/20252474/PSDP%20Project%20Catalogue.pdf.
85	Mekong River Commision, Lower Mekong hydro power database, (n.d.); http://portal.mrcmekong.org/master-catalogue/search?giai=9506000003818_________E0100eij&max=25&relation=overlaps&sort=relevance.
86	Meral Elektrik Üretim A.Ș., Esendurak HEPP project, (2011); http://translate.google.de/translate?hl=en&sl=tr&u=http://fc-tk.futurecamp.de/assets/Project-Summary-TR/OzetEsendurak2011-01-10.pdf&prev=/search%3Fq%3D%25C2%25A0ESENDURAK%2Bhes%26hl%3Den%26biw%3D1920%26bih%3D1069&sa=X&ei=CkxUUchrh6K0Bu_ggMAC&ved=0CDMQ7gEwAA.
87	Midseff, “Tortum ii hydro electric power plant: Non technical summary (nts) ” (Midseff, Istanbul, Turkey, 2012); http://www.midseff.com/nts/tortum.pdf.
88	Modern Power Systems, Russian firm to build hydro plants in Turkey, (2011); http://www.modernpowersystems.com/news/newsrussian-firm-to-build-hydro-plants-in-turkey.
89	K. H. Mon, Kachin hydroelectric plants to power nation, and China, (2011); http://www.mmtimes.com/2011/business/560/biz56003.html.
90	N-Su Mühendislik & Müşavirlik Ltd, Referanslar, (n.d.); http://translate.google.de/translate?hl=en&sl=tr&u=http://www.ensu.com.tr/referanslar.php%3FID%3D1&prev=/search%3Fq%3D%25C2%25A0PAZARK%25C3%2596Y%2Bhes%26hl%3Den%26sa%3DN%26biw%3D1920%26bih%3D1069&sa=X&ei=TBhHUdnhLYOGswacrIH4DA&ved=0CDEQ7gEwAA.
91	Nam Ngum 3 power company, “Resettlement & ethnic minority development plan of the Nam Ngum 3 hydropower project” (Nam Ngum 3 power company, Vientiane, Lao, 2011); http://www2.adb.org/Documents/REMDPs/LAO/41385/41385-013-lao-remdp.pdf.
92	Nargesi Dam Site Dalaki River - Panoramio, (2010); http://www.panoramio.com/photo/37264328.
93	L. Nayanjot, “Srinagar hydroelectric power project” (Department of History, University of Dehli, India, 2011); http://moef.nic.in/downloads/public-information/DOC200611.pdf.
94	H. Oo, Kia ambush on Tarpein(1) staff vehicle?, (2011); http://hlaoo1980.blogspot.de/2011/08/kia-ambush-on-tarpein1-staff-vehical.html.
95	Pak Tribune, Ppib approves lois to 7 hydropower projects, (2008); http://www.paktribune.com/news/print.php?id=168365.
96	Pakistan Water and Power Development Authority, Future projects, (n.d.); http://www.wapda.gov.pk/htmls/future-index.html.
97	Paravani Hydroelectric Power Plant Project, (n.d.); http://www.paravanihpp.com/.
98	“Pervari Hydroelectric Power Project”, (2009); http://www.insitusoil.com/docs/Pervari_Turkey.pdf.
99	Pm Visits Nam Khan 2 Hydro Site, (2013); http://mekong.waterandfood.org/archives/1571.
100	Power-Technology.Com, Lower Subansiri hydroelectric power project, (n.d.); http://www.power-technology.com/projects/lower-subansiri-hydroelectric-power-project/.
101	Power Engineering International, Growth sets a fast pace for Turkey's power sector, (2011); http://www.powerengineeringint.com/articles/mee/print/volume-8/issue-2/features/growth-sets-a-fast-pace-for-turkeys-power-sector.html.
102	Probe International, An inconvenient truth: China uses global warming to justify controversial nu river dams project, (2011); http://journal.probeinternational.org/2011/02/03/inconvenient-truth-dams/.
103	Project Monitor, Neepco expects to commission Pare HEP by September 2014, (2013); http://www.projectsmonitor.com/daily-wire/neepco-expects-to-commission-pare-hep-by-september-2014/.
104	Prosem Engineering, Kayraktepe dam and hydropower project, (n.d.); http://blog.prosem.biz/consultancy-projects/kayraktepe-dam-and-hydropower-project.
105	Protest Hydroelectric Power Plants in Uzungöl, (2013); http://translate.google.de/translate?hl=en&sl=tr&u=http://www.haberler.com/uzungol-e-yapilacak-hes-e-protesto-4428770-haberi/&prev=/search%3Fq%3DUZUNG%25C3%2596L%2Bhes%26hl%3Den%26biw%3D1920%26bih%3D1069&sa=X&ei=NgdLUfyeAobktQaT_oCQAw&ved=0CGgQ7gEwCA.
106	Pt Pln (Persero), Plta Cisokan, (n.d.); http://www.google.de/imgres?imgurl=http%3A%2F%2Fwww.pln.co.id%2Fhidrojb%2Ffiles%2F2013%2F02%2Fin.jpg&imgrefurl=http%3A%2F%2Fwww.pln.co.id%2Fhidrojb%2Fplta-cisokan%2F&h=1176&w=1844&tbnid=ixG_jfheT9mCGM%3A&zoom=1&docid=u_orn1yBEa7cSM&ei=xqJPU9TjFYnCtAaM9ICwAw&tbm=isch&client=firefox-a&iact=rc&uact=3&dur=327&page=1&start=0&ndsp=34&ved=0CFsQrQMwAQ.
107	Rivers without Boundaries Coalition, Who will be drowned by the Shuren reservoir on Selenge river?, (n.d.); http://www.transrivers.org/asian-rivers-spatial-information-system/who-will-be-drowned-by-the-shuren-reservoir-look-at-the-map/.
108	M. Ronayne, K. Yildiz, R. Harris, “The cultural and environmental impacts of large dams in South East Turkey” (National Univeristy of Ireland, Galway, Ireland & Kurdish Human Rights Project, London, United Kingdom, 2005); http://www.eca-watch.at/downloads/D4.%20Cultural%20and%20Environment%20Impact%20of%20Large%20Dams.pdf.
109	Russian Firm reportedly eyeing 950mw of hydro in Turkey, (2011); http://www.icis.com/heren/articles/2011/03/21/9445786/russian-firm-reportedly-eyeing-950mw-of-hydro-in-turkey.html.
110	S. Saber, Iran again accused of trying to halt Afghan dam, (2010); http://iwpr.net/report-news/iran-again-accused-trying-halt-afghan-dam.
111	Sai Gon Giai Phong, Lai chau hydropower plant contract signed (2011); http://www.saigon-gpdaily.com.vn/Business/2011/5/92736/.
112	Salween Watch, Recent dam and water diversion plans, (n.d.); http://www.salweenwatch.org/index.php?view=article&id=51%3Arecent-dam-and-water-diversion-plans&tmpl=component&print=1&page=&option=com_content&Itemid=60.
113	Salween Watch, Special projects implementation committee holds coordination meeting, (2006); http://www.salweenwatch.org/index.php?option=com_content&view=article&id=150%3Aspecial-projects-implementation-committee-holds-coordination-meeting&Itemid=70.
114	U. Schwarz, “Balkan rivers - the blue heart of Europe: hydromorphological status and dam projects” (FLUVIUS, Vienna, Austria, 2012.); http://riverwatch.eu/wp-content/uploads/2012/05/BalkanRiverAssessment29032012web.pdf.
115	Social Risk Management LLC, “Yamanli II weir and HEPP” (Social Risk Management LLC , Washington, USA, 2011); http://www.enerjisa.com.tr/tr-TR/ElektrikUretimi/Documents/YAMANLI%20II%20HEPP%20Final_RAP_27_10.pdf.
116	Song Da N°9 Jsc, Huoi quang hydropower project, (n.d.); http://songda9.com/index.php?option=com_content&view=article&id=537&Itemid=513&lang=en.
117	South Asia Network on Dams Rivers and People, Basin maps, (n.d.); http://sandrp.in/basin_maps/.
118	Soyak Energy, Gullubag dam and HEPP project, (n.d.); http://translate.google.de/translate?hl=en&sl=tr&u=http://www.soyakenerji.com.tr/tr-TR/Content/FaaliyetAlanlarimiz/56/gullubag-baraji-ve-hes-projesi.aspx&prev=/search%3Fq%3D%25C2%25A0G%25C3%259CLL%25C3%259CBA%25C4%259E%2Bhes%26hl%3Den%26biw%3D1920%26bih%3D1069&sa=X&ei=w0VHUfG6KcjLtAarloGoDQ&ved=0CDQQ7gEwAA.
119	State Planning Unit Chief Ministers Department, Hydroelectric power dams in Sarawak http://www.siwrs.com.my/modules/iwrm/page.php?id=8&menu_id=0&sub_id=3.
120	Statkraft, “Çetín hydropower project ” (Statkraft , Oslo, Norway, n.d.); http://gurcanozkan.files.wordpress.com/2011/02/turkey-cetin_-hepp_-project.pdf.
121	Statkraft, Selected projects, (n.d.); http://www.statkraft.com/projects/.
122	Steelguru, Gd power unit to invest cny 19 billion to build hydropower plant, (2011); http://www.steelguru.com/chinese_news/GD_Power_unit_to_invest_CNY_19_billion_to_build_hydropower_plant/238791.html.
123	Stimson Center, Interactive Mekong map, (2011); http://www.stimson.org/infographics/interactive-mekong-map/.
124	Su-Yapi, List of dams and hydroelectric power plants which Su-Yapi has participated since 1975, (2011); http://www.suyapi.com.tr/uploadimg/download/PDF_Ingilizce/03_POWER/03A-Dam&HEPP.pdf.
125	Ta’ang Students and Youth Organization, “Shweli under siege” (Ta’ang Students and Youth Organization, Mae Sot Tak, Thailand, 2011); http://www.burmalibrary.org/docs13/Sheweli_Under_Siege%28en%29-red.pdf.
126	J. Tabish, Iran faces renewed Afghan dam sabotage claims, (2011); http://iwpr.net/report-news/iran-faces-renewed-afghan-dam-sabotage-claims.
127	Tablieh Construction Company, Shahriar dam, http://www.tablieh.com/pages/dams/shahriar/index.html.
128	Teba News, Multiple HEPP projects, (2012); http://www.tebanews.com.tr/news_detail.aspx?id=203444.
129	The New Light of Myanmar, “Nancho hydropower project implementation commences in nay pyi taw pyinmana” (The New Light of Myanmar , Naypyidaw, Myanmanr, 2009); http://www.burmalibrary.org/docs6/NLM2009-02-25.pdf.
130	The Express Tribune, Breakthrough in Afghanistan: Nespak awarded $500m Bakhshabad dam project, (2013); http://tribune.com.pk/story/513556/breakthrough-in-afghanistan-nespak-awarded-500m-bakhshabad-dam-/.
131	The Iraqi Civil Society Solidarity Initiative, Controversial Ilisu dam on hasankeyf halted by Turkish court, (2013); http://www.iraqicivilsociety.org/archives/1055.
132	Tibet's largest Pangduo hydro project builds world's deepest cutoff Wall, (2010); http://en.tibet328.cn/01/01/201009/t771954.htm.
133	T. Tsering, Dams on the Drichu (Yangtze), Zachu (Mekong) and Gyalmo ngulchu (Salween) rivers on the Tibetan plateau, (2013); http://tibetanplateau.blogspot.de/2013/03/2013-update-dams-on-drichu-yangtze.html.
134	Tupolang-1 Powerplant - Enipedia, (n.d.); http://enipedia.tudelft.nl/wiki/Tupolang-1_Powerplant.
135	Türkerler Holding A.Ş, Dilektaşı i/ii dam and hydroelectric power plant, (n.d.); http://www.turkerler.com/en/hydroelectric/diliktasi-i-ii-dam-and-hydroelectric-power-plant/.
136	Türkerler Holding A.Ş, Kayabeyi dam and Akıncı hydroelectric power plant project, (n.d.); http://www.turkerler.com/en/infrastructure/kayabeyi-dam-and-akinci-hydroelectric-power-plant-project/.
137	Tuzkoy hidroelektrik santrali icin kamulastrima karari, (2012); http://translate.google.com/translate?hl=en&sl=tr&tl=en&u=http%3A%2F%2Fwww.fibhaber.com%2Fgundem%2Ftuzkoy-hidroelektrik-santrali-icin-kamulastirma-karari-h720.html&anno=2.
138	Uznews.Net, Eu in dispute with tashkent over Kambarata hydropower station, (2013); http://www.uznews.net/en/world/22057-eu-in-dispute-with-tashkent-over-kambarata-hydropower-station.
139	Vedat Unal, Timarli HES - (2010); http://www.panoramio.com/photo/44926633.
140	Vietnam Investment Review, List of power plants scheduled to come online until 2020, (Vietnam Investment Review, Hanoi, Vietnam, n.d.); http://www.vir.com.vn/data/files/electricity_list.pdf.
141	I. B. Walter, Groups behind 6 hydro power plants seeking lumad consent in Bukidnon, (2012); http://www.mindanews.com/human-rights/2012/06/28/groups-behind-6-hydro-power-plants-seeking-lumad-consent-in-bukidnon/.
142	Water Resources Information System of India, Pakal dul dam d02983, (2012); http://india-wris.nrsc.gov.in/wrpinfo/index.php?title=Pakal_Dul_Dam_D02983.
143	World Bank, “Indonesia - upper Cisokan pumped storage power project ” (World Bank, Washington, USA, 2011); http://documents.worldbank.org/curated/en/2011/04/14171427/indonesia-upper-cisokan-pumped-storage-power-project.
144	World Bank, “Preparation of an environmental and social impact assessment (esia)” (World Bank, Washington, USA, n.d.); http://www-wds.worldbank.org/external/default/WDSContentServer/WDSP/IB/2010/12/05/000333038_20101205224029/Rendered/PDF/E24760V50EA0P01LIC10TOR0ESIA0281010.pdf.
145	World Bank, Project information - Kolin Akkoy II HPP, (2011); http://ppi-re.worldbank.org/Data/Project/kolin-akkoy-ii-hpp-6806.
146	C. Yapi, Ömerlerdüzü HES - google maps, (2012); https://maps.google.com/maps/ms?ie=UTF8&t=h&oe=UTF8&msa=0&msid=201910395144572698983.0004b7c0aa25bf91dbb12.
147	C. Yapi, Şemdİnlİ HES - google maps, (2011); https://maps.google.com/maps/ms?ie=UTF8&t=h&vpsrc=6&oe=UTF8&msa=0&msid=201910395144572698983.0004b2e16d670e6195551.
148	Yenilenebilir Enerji Genel Müdürlüğü, Yegm tarafından mühendislik hizmetleri yürütülenhidroelektrik santral projeleri, (2011); http://www.eie.gov.tr/HES/index.aspx.
149	Yolsu Engineering Services Ltd Co, Yoncal HEPP / feasibility reports, http://www.yolsu.com.tr/index.php?p=tsrlr&b=tsrdty&tsrid=138.
150	Yüksel İnşaat A.Ş, Kandil dam and HEPP, (2011); http://www.yuksel.net/index.php?option=com_content&view=article&id=119%3Akandil-baraj-ve-hes-tesisleri&catid=78%3Abarajlar-ve-hes&Itemid=348&lang=enhes&Itemid=348&lang=en.
151	W. Zhang, Laos, nam ou: Hydropower projects to light up northern provinces (2012); http://damsandalternatives.blogspot.de/2012/02/laos-nam-ou-hydropower-projects-to.html.

## Sheet: Table S1 - Oceania
Table S1. List of 359 references for compiled future hydropower dam data.
Oceania
1	A. Bartle, R. Taylor, Hydropower and Dams World Atlas and Industry guide. Aqua-Media International, (2012).
2	H. Kivia, Lae to open 2nd largest fish factory, (2012); http://www.postcourier.com.pg/20120816/news05.htm.
3	Meridian Energy Limited, Amuri project, (n.d.); http://www.meridianenergy.co.nz/what-we-do/our-projects/hydro-projects/amuri/.
4	National Institute of Water and Atmospheric Research, North bank tunnel concept – water consents: River geomorphology, sediment transport, coastal processes and flood hazard management, (2006); http://www.meridianenergy.co.nz/about-us/generating-energy/our-generation-projects/north-bank-hydro-project/.
5	Origin Energy, “Fact sheet - png renewable energy project” (Origin Energy, Sydney, Australia, n.d.); http://www.originenergy.com.au/files/FactSheetPNGRenewableEnergyProject.pdf.
6	Save the Clutha, Save Beaumont, (2009); http://savetheclutha.blogspot.de/2009/04/beaumont.html.
7	The New Zealand Herald, New dam plans for Clutha river released, (2009); http://www.nzherald.co.nz/business/news/article.cfm?c_id=3&objectid=10567071.

## Sheet: Table S1 - misc
Table S1. List of 359 references for compiled future hydropower dam data.
Data from the following sources was used for some dam attributes but original data sources could not be located
1	List of Power Stations in Uganda, (n.d.); http://en.wikipedia.org/wiki/List_of_power_stations_in_Uganda.
2	Dams in Burma - Wikipedia, the free encyclopedia, (n.d.); http://en.wikipedia.org/wiki/Dams_in_Burma.
3	Kyaukme dam - Wikipedia, the free encyclopedia, (n.d.); http://en.wikipedia.org/wiki/Kyaukme_Dam.
4	List of major power stations in Guizhou - Wikipedia, the free encyclopedia, (n.d.); http://en.wikipedia.org/wiki/List_of_major_power_stations_in_Guizhou.
5	Tingzikou dam - Wikipedia, the free encyclopaedia, (n.d.); http://en.wikipedia.org/wiki/Tingzikou_Dam.

## Sheet: Table S2
Table S2. Overview on total numbers (under construction and planned) and capacity of future hydropower dams per country and continent.
			Dams under implementation
	per country				per continent
		number		capacity (MW)	number	capacity (MW)
North & Central America	Belize	1		18	177	23659
	Canada	34		18099
	Costa Rica	43		703
	El Salvador	1		65
	Guatemala	2		392
	Haiti	1		30
	Honduras	2		71
	Mexico	7		1951
	Nicaragua	18		351
	Panama	58		946
	USA	10		1033
South America	Argentina	70		17267	1302	167903
	Bolivia	24		3398
	Brazil	1027		89489
	Chile	28		5685
	Colombia	30		5169
	Dom. Rep.	2		107
	Ecuador	67		10817
	Guyana	4		529
	Peru	47		29392
	Venezuela	3		6050
Europe	Albania	100		3480	652	34059
	Austria	25		802
	Belarus	7		142
	Bosnia & Herzegovina	122		2874
	Bulgaria	49		971
	Croatia	81		1788
	France	1		30
	Greece	6		152
	Hungary	1		2
	Iceland	4		345
	Kosovo	23		481
	Macedonia	23		1044
	Montenegro	83		1994
	Poland	1		80
	Portugal	10		1317
	Romania	2		315
	Russia (European)	11		14210
	Serbia	59		3109
	Slovenia	42		827
	Spain	1		92
	UK	1		3
Africa	Angola	4		1620	200	110984
	Benin	6		414
	Burkina Faso	2		74
	Burundi	3		105
	Cameroon	8		2310
	C. African Republic	1		30
	Congo, Dem. Rep.	5		44865
	Congo, Rep.	3		1750
	Côte d'Ivoire	13		1762
	Egypt, Arab Rep.	1		43.2
	Ethiopia	17		16056.8
	Gabon	2		160
	Ghana	12		1000
	Guinea	23		3450.1
	Kenya	6		669.6
	Lesotho	2		1000
	Liberia	7		516.5
	Malawi	2		400
	Mali	13		1243.5
	Morocco	2		125
	Mozambique	4		3028
	Namibia	3		990
	Niger	2		252.5
	Nigeria	3		11300
	Rwanda	1		28
	S. Sudan	5		2855
	Sierra Leone	6		754
	South Africa	3		80
	Sudan	4		2480
	Tanzania	7		2463
	Togo	1		20
	Uganda	16		1360.96
	Zambia	10		6541.4
	Zimbabwe	3		1236
Asia	Afghanistan	5		74.2	1361	371940
	Bangladesh	1		495
	Bhutan	12		7080
	Cambodia	15		5256
	China	238		163404
	Georgia	20		2237.7
	India	181		44157.7
	Indonesia	7		1673.3
	Iran	7		3185
	Japan	4		14.6
	Korea, Dem. Rep.	1		14
	Kyrgyzstan	1		2000
	Lao PDR	81		16733.2
	Malaysia	6		3009
	Mongolia	1		300
	Myanmar	26		34827.5
	Nepal	285		15119.9
	Pakistan	57		45680.3
	Philippines	7		424.637
	Russia (Asian part)	2		635
	Sri Lanka	3		69
	Tajikistan	1		3600
	Turkey	346		18101.2
	Uzbekistan	1		175
	Vietnam	53		3711
Oceania	New Zealand	6		1079	8	2888
	Papua New Guinea	2		1809

## Sheet: Table S3
Table S3. Overview on total numbers (under construction and planned) of future hydropower dams in hotspot major basins (> 50 dams per basin) and the respective countries that are involved. Numbers given in brackets refer to planned dams. Within each continent, major basins are sorted alphabetically.
		Dams under implementation
		per country within the basin		per major basin
North & Central America	Southern Central America	Costa Rica	43 (40)	122 (110)
		El Salvador	1 (1)
		Honduras	2 (0)
		Nicaragua	18 (17)
		Panama	58 (43)
South America	La Plata	Argentina	9 (8)	447 (418)
		Bolivia	13 (13)
		Brazil	425 (397)
	Uruguay – Brazil, South Atlantic Coast	Brazil		295 (277)
	Amazon	Bolivia	10 (8)	187 (148)
		Brazil	106 (84)
		Colombia	2 (2)
		Ecuador	31 (23)
		Peru	38 (31)
	Tocantins	Brazil		85 (82)
	Sao Francisco	Brazil		81 (80)
Europe	Danube	Austria	22 (21)	341 (331)
		Bosnia & Herzegovina	106 (105)
		Bulgaria	14 (9)
		Croatia	44 (43)
		Hungary	1 (1)
		Kosovo	2 (2)
		Montenegro	59 (59)
		Romania	2 (1)
		Serbia	57 (57)
		Slovenia	34 (33)
	Adriatic Sea – Greece – Black Sea Coast	Albania	100 (93)	276 (261)
		Bosnia & Herzegovina	16 (13)
		Bulgaria	35 (33)
		Croatia	37 (37)
		Greece	6 (4)
		Kosovo	21 (21)
		Macedonia	23 (22)
		Montenegro	24 (24)
		Serbia	2 (2)
		Slovenia	8 (8)
		Turkey	4 (4)
Asia	Ganges – Brahmaputra	Bangladesh	1 (0)	414 (328)
		Bhutan	12 (4)
		China	8 (5)
		India	108 (80)
		Nepal	285 (239)
	Black Sea South East	Georgia	17 (3)	186 (156)
		Turkey	169 (153)
	Yangtze	China		140 (45)
	Mekong	Cambodia	13 (13)	123 (107)
		China	25 (16)
		Lao PDR	81 (75)
		Myanmar	3 (2)
		Vietnam	1 (1)
	Indus	Afghanistan	1 (0)	118 (75)
		India	62 (29)
		Pakistan	55 (46)
	Mediterranean Sea – East Coast	Turkey		92 (82)
	Tigris – Euphrates	Iran	4 (0)	70 (57)
		Turkey	66 (57)

[truncated: 5 more sheets: Table S4, Table S5, Table S6, Table S7, Table S8]
